# Supplementary material
Source: Preprints.org preprint supplement (doi:10.20944/preprints202004.0089.v2)
Supplement: Supplementary file 1 [file supplementary]

**Table 1****Size of the variant clusters of the Sars-CoV-2 Envelope and Membrane proteins**

| <b>Variant</b>           | <b>Cluster size<br/>(no of<br/>sequences)</b> | <b>Accession<br/>code</b> | <b>Definition</b>       |
|--------------------------|-----------------------------------------------|---------------------------|-------------------------|
| <b>Envelope</b>          |                                               |                           |                         |
| YP_009724392 (reference) | 795                                           |                           |                         |
| His37                    | 1                                             | MT039890                  | Korea/SNU01/2020        |
| Leu72                    | 1                                             | MT293206                  | USA/WA-UW-1588/2020     |
| <b>Membrane</b>          |                                               |                           |                         |
| YP_009724393 (reference) | 773                                           |                           |                         |
| Ser2                     | 1                                             | MT291836                  | CHN/Wuhan_IME-BJo7/2020 |
| Gly3                     | 1                                             | Mt325626                  | USA/SC_3572/2020        |
| Val57, Arg89             | 1                                             | MT127115                  | VIE/NIHE/2020           |
| Ile70                    | 3                                             | MT293184                  | USA/WA-UW-1297/2020     |
|                          |                                               | MT326166                  | USA/WA-UW-1735/2020     |
|                          |                                               | MT293211                  | USA/WA-UW-1591/2020     |
| Ser85                    | 1                                             | MT326167                  | USA/WA-UW-1753/2020     |
| Met175                   | 2                                             | MT326093                  | USA/WA-UW-1775/2020     |
|                          |                                               | MT246451                  | USA/WA-UW194/2020       |
