# Supplementary material
Source: Preprints.org preprint supplement (doi:10.20944/preprints202004.0089.v2)
Supplement: Supplementary file 2 [file supplementary]

Archive with 3 entries (3 files):
- SupplementaryTable1.xlsx
- Supplementary_description.pdf
- Table1.pdf
