# Supplementary material
Source: Preprints.org preprint supplement (doi:10.20944/preprints202004.0089.v2)
Supplement: Supplementary file 2 [file supplementary › SupplementaryTable1.xlsx]

## Sheet: SupplementaryTable1
1	>NC_045512.2 Severe acute respiratory syndrome coronavirus 2 isolate Wuhan-Hu-1, complete genome
2	>MN988669.1 Severe acute respiratory syndrome coronavirus 2 isolate 2019-nCoV WHU02, complete genome
3	>MN988668.1 Severe acute respiratory syndrome coronavirus 2 isolate 2019-nCoV WHU01, complete genome
4	>MT324062.1 Severe acute respiratory syndrome coronavirus 2 isolate SARS-CoV-2/human/ZAF/R03006/2020, complete genome
5	>MT281577.1 Severe acute respiratory syndrome coronavirus 2 isolate SARS-CoV-2/human/CHN/Fuyang_FY002/2020, complete genome
6	>MT263074.1 Severe acute respiratory syndrome coronavirus 2 isolate SARS-CoV-2/human/PER/Peru-10/2020, complete genome
7	>MT126808.1 Severe acute respiratory syndrome coronavirus 2 isolate SARS-CoV-2/human/BRA/SP02/2020, complete genome
8	>MT007544.1 Severe acute respiratory syndrome coronavirus 2 isolate Australia/VIC01/2020, complete genome
9	>MT344963.1 Severe acute respiratory syndrome coronavirus 2 isolate SARS-CoV-2/human/USA/NC_0025/2020, complete genome
10	>MT344962.1 Severe acute respiratory syndrome coronavirus 2 isolate SARS-CoV-2/human/USA/MN_0101/2020, complete genome
11	>MT344961.1 Severe acute respiratory syndrome coronavirus 2 isolate SARS-CoV-2/human/USA/NV_0016/2020, complete genome
12	>MT344960.1 Severe acute respiratory syndrome coronavirus 2 isolate SARS-CoV-2/human/USA/RI_0882/2020, complete genome
13	>MT344959.1 Severe acute respiratory syndrome coronavirus 2 isolate SARS-CoV-2/human/USA/PA_2887/2020, complete genome
14	>MT344958.1 Severe acute respiratory syndrome coronavirus 2 isolate SARS-CoV-2/human/USA/PA_2735/2020, complete genome
15	>MT344957.1 Severe acute respiratory syndrome coronavirus 2 isolate SARS-CoV-2/human/USA/PA_2734/2020, complete genome
16	>MT344956.1 Severe acute respiratory syndrome coronavirus 2 isolate SARS-CoV-2/human/USA/OH_0020/2020, complete genome
17	>MT344955.1 Severe acute respiratory syndrome coronavirus 2 isolate SARS-CoV-2/human/USA/OH_0019/2020, complete genome
18	>MT344954.1 Severe acute respiratory syndrome coronavirus 2 isolate SARS-CoV-2/human/USA/MN_0100/2020, complete genome
19	>MT344953.1 Severe acute respiratory syndrome coronavirus 2 isolate SARS-CoV-2/human/USA/MD_0027/2020, complete genome
20	>MT344952.1 Severe acute respiratory syndrome coronavirus 2 isolate SARS-CoV-2/human/USA/IN_92003/2020, complete genome
21	>MT344951.1 Severe acute respiratory syndrome coronavirus 2 isolate SARS-CoV-2/human/USA/IN_82003/2020, complete genome
22	>MT344950.1 Severe acute respiratory syndrome coronavirus 2 isolate SARS-CoV-2/human/USA/IN_72003/2020, complete genome
23	>MT344949.1 Severe acute respiratory syndrome coronavirus 2 isolate SARS-CoV-2/human/USA/HI_7881/2020, complete genome
24	>MT344948.1 Severe acute respiratory syndrome coronavirus 2 isolate SARS-CoV-2/human/USA/HI_4970/2020, complete genome
25	>MT344947.1 Severe acute respiratory syndrome coronavirus 2 isolate SARS-CoV-2/human/USA/GA_2275/2020, complete genome
26	>MT344946.1 Severe acute respiratory syndrome coronavirus 2 isolate SARS-CoV-2/human/USA/GA_2147/2020, complete genome
27	>MT344945.1 Severe acute respiratory syndrome coronavirus 2 isolate SARS-CoV-2/human/USA/GA_2070/2020, complete genome
28	>MT344944.1 Severe acute respiratory syndrome coronavirus 2 isolate SARS-CoV-2/human/USA/CT_9849/2020, complete genome
29	>MT345888.1 Severe acute respiratory syndrome coronavirus 2 isolate SARS-CoV-2/human/USA/ID-UW-4461/2020, complete genome
30	>MT345887.1 Severe acute respiratory syndrome coronavirus 2 isolate SARS-CoV-2/human/USA/ID-UW-4448/2020, complete genome
31	>MT345886.1 Severe acute respiratory syndrome coronavirus 2 isolate SARS-CoV-2/human/USA/ID-UW-4433/2020, complete genome
32	>MT345885.1 Severe acute respiratory syndrome coronavirus 2 isolate SARS-CoV-2/human/USA/ID-UW-4427/2020, complete genome
33	>MT345884.1 Severe acute respiratory syndrome coronavirus 2 isolate SARS-CoV-2/human/USA/ID-UW-4424/2020, complete genome
34	>MT345883.1 Severe acute respiratory syndrome coronavirus 2 isolate SARS-CoV-2/human/USA/WA-UW-4407/2020, complete genome
35	>MT345882.1 Severe acute respiratory syndrome coronavirus 2 isolate SARS-CoV-2/human/USA/WA-UW-4406/2020, complete genome
36	>MT345881.1 Severe acute respiratory syndrome coronavirus 2 isolate SARS-CoV-2/human/USA/WA-UW-4404/2020, complete genome
37	>MT345880.1 Severe acute respiratory syndrome coronavirus 2 isolate SARS-CoV-2/human/USA/ID-UW-4400/2020, complete genome
38	>MT345879.1 Severe acute respiratory syndrome coronavirus 2 isolate SARS-CoV-2/human/USA/ID-UW-4396/2020, complete genome
39	>MT345878.1 Severe acute respiratory syndrome coronavirus 2 isolate SARS-CoV-2/human/USA/OR-UW-4388/2020, complete genome
40	>MT345877.1 Severe acute respiratory syndrome coronavirus 2 isolate SARS-CoV-2/human/USA/ID-UW-4380/2020, complete genome
41	>MT345876.1 Severe acute respiratory syndrome coronavirus 2 isolate SARS-CoV-2/human/USA/ID-UW-4378/2020, complete genome
42	>MT345875.1 Severe acute respiratory syndrome coronavirus 2 isolate SARS-CoV-2/human/USA/ID-UW-4375/2020, complete genome
43	>MT345874.1 Severe acute respiratory syndrome coronavirus 2 isolate SARS-CoV-2/human/USA/CT-UW-4372/2020, complete genome
44	>MT345873.1 Severe acute respiratory syndrome coronavirus 2 isolate SARS-CoV-2/human/USA/CT-UW-4366/2020, complete genome
45	>MT345872.1 Severe acute respiratory syndrome coronavirus 2 isolate SARS-CoV-2/human/USA/ID-UW-4357/2020, complete genome
46	>MT345871.1 Severe acute respiratory syndrome coronavirus 2 isolate SARS-CoV-2/human/USA/ID-UW-4355/2020, complete genome
47	>MT345870.1 Severe acute respiratory syndrome coronavirus 2 isolate SARS-CoV-2/human/USA/CT-UW-4347/2020, complete genome
48	>MT345869.1 Severe acute respiratory syndrome coronavirus 2 isolate SARS-CoV-2/human/USA/CT-UW-4346/2020, complete genome
49	>MT345868.1 Severe acute respiratory syndrome coronavirus 2 isolate SARS-CoV-2/human/USA/CT-UW-4344/2020, complete genome
50	>MT345867.1 Severe acute respiratory syndrome coronavirus 2 isolate SARS-CoV-2/human/USA/WA-UW-2258/2020, complete genome
51	>MT345866.1 Severe acute respiratory syndrome coronavirus 2 isolate SARS-CoV-2/human/USA/ID-UW-2255/2020, complete genome
52	>MT345865.1 Severe acute respiratory syndrome coronavirus 2 isolate SARS-CoV-2/human/USA/WA-UW-2208/2020, complete genome
53	>MT345862.1 Severe acute respiratory syndrome coronavirus 2 isolate SARS-CoV-2/human/USA/WA-UW-2213/2020, complete genome
54	>MT345861.1 Severe acute respiratory syndrome coronavirus 2 isolate SARS-CoV-2/human/USA/WA-UW-2212/2020, complete genome
55	>MT345860.1 Severe acute respiratory syndrome coronavirus 2 isolate SARS-CoV-2/human/USA/WA-UW-2214/2020, complete genome
56	>MT345859.1 Severe acute respiratory syndrome coronavirus 2 isolate SARS-CoV-2/human/USA/WA-UW-2215/2020, complete genome
57	>MT345858.1 Severe acute respiratory syndrome coronavirus 2 isolate SARS-CoV-2/human/USA/ID-UW-2174/2020, complete genome
58	>MT345857.1 Severe acute respiratory syndrome coronavirus 2 isolate SARS-CoV-2/human/USA/ID-UW-2198/2020, complete genome
59	>MT345856.1 Severe acute respiratory syndrome coronavirus 2 isolate SARS-CoV-2/human/USA/WA-UW-2218/2020, complete genome
60	>MT345855.1 Severe acute respiratory syndrome coronavirus 2 isolate SARS-CoV-2/human/USA/WA-UW-2245/2020, complete genome
61	>MT345854.1 Severe acute respiratory syndrome coronavirus 2 isolate SARS-CoV-2/human/USA/WA-UW-2219/2020, complete genome
62	>MT345853.1 Severe acute respiratory syndrome coronavirus 2 isolate SARS-CoV-2/human/USA/WA-UW-2230/2020, complete genome
63	>MT345852.1 Severe acute respiratory syndrome coronavirus 2 isolate SARS-CoV-2/human/USA/WA-UW-2192/2020, complete genome
64	>MT345851.1 Severe acute respiratory syndrome coronavirus 2 isolate SARS-CoV-2/human/USA/WA-UW-2232/2020, complete genome
65	>MT345850.1 Severe acute respiratory syndrome coronavirus 2 isolate SARS-CoV-2/human/USA/WA-UW-2193/2020, complete genome
66	>MT345849.1 Severe acute respiratory syndrome coronavirus 2 isolate SARS-CoV-2/human/USA/WA-UW-2235/2020, complete genome
67	>MT345848.1 Severe acute respiratory syndrome coronavirus 2 isolate SARS-CoV-2/human/USA/WA-UW-2238/2020, complete genome
68	>MT345847.1 Severe acute respiratory syndrome coronavirus 2 isolate SARS-CoV-2/human/USA/WA-UW-2253/2020, complete genome
69	>MT345846.1 Severe acute respiratory syndrome coronavirus 2 isolate SARS-CoV-2/human/USA/WA-UW-2234/2020, complete genome
70	>MT345844.1 Severe acute respiratory syndrome coronavirus 2 isolate SARS-CoV-2/human/USA/WA-UW-2180/2020, complete genome
71	>MT345843.1 Severe acute respiratory syndrome coronavirus 2 isolate SARS-CoV-2/human/USA/WA-UW-2179/2020, complete genome
72	>MT345842.1 Severe acute respiratory syndrome coronavirus 2 isolate SARS-CoV-2/human/USA/WA-UW-2250/2020, complete genome
73	>MT345841.1 Severe acute respiratory syndrome coronavirus 2 isolate SARS-CoV-2/human/USA/WA-UW-2247/2020, complete genome
74	>MT345840.1 Severe acute respiratory syndrome coronavirus 2 isolate SARS-CoV-2/human/USA/WA-UW-2249/2020, complete genome
75	>MT345838.1 Severe acute respiratory syndrome coronavirus 2 isolate SARS-CoV-2/human/USA/WA-UW-2236/2020, complete genome
76	>MT345836.1 Severe acute respiratory syndrome coronavirus 2 isolate SARS-CoV-2/human/USA/WA-UW-2228/2020, complete genome
77	>MT345835.1 Severe acute respiratory syndrome coronavirus 2 isolate SARS-CoV-2/human/USA/WA-UW-2244/2020, complete genome
78	>MT345834.1 Severe acute respiratory syndrome coronavirus 2 isolate SARS-CoV-2/human/USA/WA-UW-2240/2020, complete genome
79	>MT345833.1 Severe acute respiratory syndrome coronavirus 2 isolate SARS-CoV-2/human/USA/WA-UW-2203/2020, complete genome
80	>MT345832.1 Severe acute respiratory syndrome coronavirus 2 isolate SARS-CoV-2/human/USA/WA-UW-2181/2020, complete genome
81	>MT345830.1 Severe acute respiratory syndrome coronavirus 2 isolate SARS-CoV-2/human/USA/WA-UW-2149/2020, complete genome
82	>MT345829.1 Severe acute respiratory syndrome coronavirus 2 isolate SARS-CoV-2/human/USA/WA-UW-2142/2020, complete genome
83	>MT345828.1 Severe acute respiratory syndrome coronavirus 2 isolate SARS-CoV-2/human/USA/ID-UW-2160/2020, complete genome
84	>MT345827.1 Severe acute respiratory syndrome coronavirus 2 isolate SARS-CoV-2/human/USA/WA-UW-2146/2020, complete genome
85	>MT345826.1 Severe acute respiratory syndrome coronavirus 2 isolate SARS-CoV-2/human/USA/WA-UW-2144/2020, complete genome
86	>MT345825.1 Severe acute respiratory syndrome coronavirus 2 isolate SARS-CoV-2/human/USA/WA-UW-2145/2020, complete genome
87	>MT345824.1 Severe acute respiratory syndrome coronavirus 2 isolate SARS-CoV-2/human/USA/WA-UW-2140/2020, complete genome
88	>MT345823.1 Severe acute respiratory syndrome coronavirus 2 isolate SARS-CoV-2/human/USA/WA-UW-2164/2020, complete genome
89	>MT345822.1 Severe acute respiratory syndrome coronavirus 2 isolate SARS-CoV-2/human/USA/WA-UW-2141/2020, complete genome
90	>MT345821.1 Severe acute respiratory syndrome coronavirus 2 isolate SARS-CoV-2/human/USA/WA-UW-2100/2020, complete genome
91	>MT345819.1 Severe acute respiratory syndrome coronavirus 2 isolate SARS-CoV-2/human/USA/WA-UW-2112/2020, complete genome
92	>MT345817.1 Severe acute respiratory syndrome coronavirus 2 isolate SARS-CoV-2/human/USA/ID-UW-2134/2020, complete genome
93	>MT345816.1 Severe acute respiratory syndrome coronavirus 2 isolate SARS-CoV-2/human/USA/UNKNOWN-UW-2139/2020, complete genome
94	>MT345815.1 Severe acute respiratory syndrome coronavirus 2 isolate SARS-CoV-2/human/USA/WA-UW-2137/2020, complete genome
95	>MT345814.1 Severe acute respiratory syndrome coronavirus 2 isolate SARS-CoV-2/human/USA/WA-UW-2104/2020, complete genome
96	>MT345812.1 Severe acute respiratory syndrome coronavirus 2 isolate SARS-CoV-2/human/USA/WA-UW-2094/2020, complete genome
97	>MT345811.1 Severe acute respiratory syndrome coronavirus 2 isolate SARS-CoV-2/human/USA/WA-UW-2108/2020, complete genome
98	>MT345809.1 Severe acute respiratory syndrome coronavirus 2 isolate SARS-CoV-2/human/USA/WA-UW-2119/2020, complete genome
99	>MT345808.1 Severe acute respiratory syndrome coronavirus 2 isolate SARS-CoV-2/human/USA/WA-UW-2132/2020, complete genome
100	>MT345806.1 Severe acute respiratory syndrome coronavirus 2 isolate SARS-CoV-2/human/USA/WA-UW-2087/2020, complete genome
101	>MT345805.1 Severe acute respiratory syndrome coronavirus 2 isolate SARS-CoV-2/human/USA/WA-UW-2078/2020, complete genome
102	>MT345803.1 Severe acute respiratory syndrome coronavirus 2 isolate SARS-CoV-2/human/USA/ID-UW-2127/2020, complete genome
103	>MT345802.1 Severe acute respiratory syndrome coronavirus 2 isolate SARS-CoV-2/human/USA/UNKNOWN-UW-2069/2020, complete genome
104	>MT345801.1 Severe acute respiratory syndrome coronavirus 2 isolate SARS-CoV-2/human/USA/WA-UW-2131/2020, complete genome
105	>MT345799.1 Severe acute respiratory syndrome coronavirus 2 isolate SARS-CoV-2/human/USA/WA-UW-2169/2020, complete genome
106	>MT345798.1 Severe acute respiratory syndrome coronavirus 2 isolate SARS-CoV-2/human/USA/WA-UW-2091/2020, complete genome
107	>MT320891.2 Severe acute respiratory syndrome coronavirus 2 isolate SARS-CoV-2/human/IRN/HGRC-1.1-IPI-8206/2020, complete genome
108	>MT339041.1 Severe acute respiratory syndrome coronavirus 2 isolate SARS-CoV-2/human/USA/AZ-ASU2936/2020, complete genome
109	>MT339040.1 Severe acute respiratory syndrome coronavirus 2 isolate SARS-CoV-2/human/USA/AZ-ASU2923/2020, complete genome
110	>MT339039.1 Severe acute respiratory syndrome coronavirus 2 isolate SARS-CoV-2/human/USA/AZ-ASU2922/2020, complete genome
111	>MT293225.1 Severe acute respiratory syndrome coronavirus 2 isolate SARS-CoV-2/human/USA/WA-UW-1599/2020, complete genome
112	>MT293224.1 Severe acute respiratory syndrome coronavirus 2 isolate SARS-CoV-2/human/USA/WA-UW-1608/2020, complete genome
113	>MT293222.1 Severe acute respiratory syndrome coronavirus 2 isolate SARS-CoV-2/human/USA/WA-UW-1433/2020, complete genome
114	>MT293220.1 Severe acute respiratory syndrome coronavirus 2 isolate SARS-CoV-2/human/USA/WA-UW-1470/2020, complete genome
115	>MT293219.1 Severe acute respiratory syndrome coronavirus 2 isolate SARS-CoV-2/human/USA/WA-UW-1440/2020, complete genome
116	>MT293218.1 Severe acute respiratory syndrome coronavirus 2 isolate SARS-CoV-2/human/USA/WA-UW-1441/2020, complete genome
117	>MT293216.1 Severe acute respiratory syndrome coronavirus 2 isolate SARS-CoV-2/human/USA/WA-UW-1562/2020, complete genome
118	>MT293215.1 Severe acute respiratory syndrome coronavirus 2 isolate SARS-CoV-2/human/USA/WA-UW-1569/2020, complete genome
119	>MT293213.1 Severe acute respiratory syndrome coronavirus 2 isolate SARS-CoV-2/human/USA/WA-UW-1574/2020, complete genome
120	>MT293212.1 Severe acute respiratory syndrome coronavirus 2 isolate SARS-CoV-2/human/USA/WA-UW-1576/2020, complete genome
121	>MT293211.1 Severe acute respiratory syndrome coronavirus 2 isolate SARS-CoV-2/human/USA/WA-UW-1591/2020, complete genome
122	>MT293210.1 Severe acute respiratory syndrome coronavirus 2 isolate SARS-CoV-2/human/USA/WA-UW-1578/2020, complete genome
123	>MT293209.1 Severe acute respiratory syndrome coronavirus 2 isolate SARS-CoV-2/human/USA/WA-UW-1552/2020, complete genome
124	>MT293208.1 Severe acute respiratory syndrome coronavirus 2 isolate SARS-CoV-2/human/USA/WA-UW-1587/2020, complete genome
125	>MT293207.1 Severe acute respiratory syndrome coronavirus 2 isolate SARS-CoV-2/human/USA/WA-UW-1586/2020, complete genome
126	>MT293206.1 Severe acute respiratory syndrome coronavirus 2 isolate SARS-CoV-2/human/USA/WA-UW-1588/2020, complete genome
127	>MT293205.1 Severe acute respiratory syndrome coronavirus 2 isolate SARS-CoV-2/human/USA/WA-UW-1561/2020, complete genome
128	>MT293204.1 Severe acute respiratory syndrome coronavirus 2 isolate SARS-CoV-2/human/USA/WA-UW-1446/2020, complete genome
129	>MT293202.1 Severe acute respiratory syndrome coronavirus 2 isolate SARS-CoV-2/human/USA/WA-UW-1448/2020, complete genome
130	>MT293201.1 Severe acute respiratory syndrome coronavirus 2 isolate SARS-CoV-2/human/USA/WA-UW-1611/2020, complete genome
131	>MT293200.1 Severe acute respiratory syndrome coronavirus 2 isolate SARS-CoV-2/human/USA/WA-UW-1603/2020, complete genome
132	>MT293199.1 Severe acute respiratory syndrome coronavirus 2 isolate SARS-CoV-2/human/USA/WA-UW-1581/2020, complete genome
133	>MT293198.1 Severe acute respiratory syndrome coronavirus 2 isolate SARS-CoV-2/human/USA/WA-UW-1583/2020, complete genome
134	>MT293197.1 Severe acute respiratory syndrome coronavirus 2 isolate SARS-CoV-2/human/USA/WA-UW-1593/2020, complete genome
135	>MT293196.1 Severe acute respiratory syndrome coronavirus 2 isolate SARS-CoV-2/human/USA/WA-UW-1567/2020, complete genome
136	>MT293195.1 Severe acute respiratory syndrome coronavirus 2 isolate SARS-CoV-2/human/USACT-UW430/2020, complete genome
137	>MT293194.1 Severe acute respiratory syndrome coronavirus 2 isolate SARS-CoV-2/human/USA/WA-UW-1349/2020, complete genome
138	>MT293192.1 Severe acute respiratory syndrome coronavirus 2 isolate SARS-CoV-2/human/USACT-UW427/2020, complete genome
139	>MT293191.1 Severe acute respiratory syndrome coronavirus 2 isolate SARS-CoV-2/human/USA/WA-UW-1346/2020, complete genome
140	>MT293190.1 Severe acute respiratory syndrome coronavirus 2 isolate SARS-CoV-2/human/USA/WA-UW-1334/2020, complete genome
141	>MT293189.1 Severe acute respiratory syndrome coronavirus 2 isolate SARS-CoV-2/human/USA/WA-UW-1322/2020, complete genome
142	>MT293188.1 Severe acute respiratory syndrome coronavirus 2 isolate SARS-CoV-2/human/USACT-UW423/2020, complete genome
143	>MT293187.1 Severe acute respiratory syndrome coronavirus 2 isolate SARS-CoV-2/human/USA/WA-UW-1347/2020, complete genome
144	>MT293186.1 Severe acute respiratory syndrome coronavirus 2 isolate SARS-CoV-2/human/USA/WA-UW-1314/2020, complete genome
145	>MT293185.1 Severe acute respiratory syndrome coronavirus 2 isolate SARS-CoV-2/human/USACT-UW420/2020, complete genome
146	>MT293184.1 Severe acute respiratory syndrome coronavirus 2 isolate SARS-CoV-2/human/USA/WA-UW-1297/2020, complete genome
147	>MT293183.1 Severe acute respiratory syndrome coronavirus 2 isolate SARS-CoV-2/human/USA/WA-UW-1296/2020, complete genome
148	>MT293182.1 Severe acute respiratory syndrome coronavirus 2 isolate SARS-CoV-2/human/USA/WA-UW-1353/2020, complete genome
149	>MT293181.1 Severe acute respiratory syndrome coronavirus 2 isolate SARS-CoV-2/human/USA/WA-UW-1338/2020, complete genome
150	>MT293180.1 Severe acute respiratory syndrome coronavirus 2 isolate SARS-CoV-2/human/USA/WA-UW-1268/2020, complete genome
151	>MT293179.1 Severe acute respiratory syndrome coronavirus 2 isolate SARS-CoV-2/human/USA/WA-UW-1300/2020, complete genome
152	>MT293178.1 Severe acute respiratory syndrome coronavirus 2 isolate SARS-CoV-2/human/USAWA-UW413/2020, complete genome
153	>MT293177.1 Severe acute respiratory syndrome coronavirus 2 isolate SARS-CoV-2/human/USA/UNKNOWN-UW-1403/2020, complete genome
154	>MT293176.1 Severe acute respiratory syndrome coronavirus 2 isolate SARS-CoV-2/human/USA/WA-UW-1417/2020, complete genome
155	>MT293175.1 Severe acute respiratory syndrome coronavirus 2 isolate SARS-CoV-2/human/USAWA-UW410/2020, complete genome
156	>MT293174.1 Severe acute respiratory syndrome coronavirus 2 isolate SARS-CoV-2/human/USAOR-UW409/2020, complete genome
157	>MT293173.1 Severe acute respiratory syndrome coronavirus 2 isolate SARS-CoV-2/human/USAWA-UW408/2020, complete genome
158	>MT293172.1 Severe acute respiratory syndrome coronavirus 2 isolate SARS-CoV-2/human/USA/WA-UW-1309/2020, complete genome
159	>MT293171.1 Severe acute respiratory syndrome coronavirus 2 isolate SARS-CoV-2/human/USA/WA-UW-1306/2020, complete genome
160	>MT293170.1 Severe acute respiratory syndrome coronavirus 2 isolate SARS-CoV-2/human/USA/WA-UW-1327/2020, complete genome
161	>MT293169.1 Severe acute respiratory syndrome coronavirus 2 isolate SARS-CoV-2/human/USA/WA-UW-1279/2020, complete genome
162	>MT293168.1 Severe acute respiratory syndrome coronavirus 2 isolate SARS-CoV-2/human/USA/WA-UW-1308/2020, complete genome
163	>MT293167.1 Severe acute respiratory syndrome coronavirus 2 isolate SARS-CoV-2/human/USA/WA-UW-1319/2020, complete genome
164	>MT293166.1 Severe acute respiratory syndrome coronavirus 2 isolate SARS-CoV-2/human/USA/WA-UW-1320/2020, complete genome
165	>MT293165.1 Severe acute respiratory syndrome coronavirus 2 isolate SARS-CoV-2/human/USA/WA-UW-1269/2020, complete genome
166	>MT293164.1 Severe acute respiratory syndrome coronavirus 2 isolate SARS-CoV-2/human/USA/WA-UW-1287/2020, complete genome
167	>MT293163.1 Severe acute respiratory syndrome coronavirus 2 isolate SARS-CoV-2/human/USAUNKNOWN-UW398/2020, complete genome
168	>MT293162.1 Severe acute respiratory syndrome coronavirus 2 isolate SARS-CoV-2/human/USA/WA-UW-1302/2020, complete genome
169	>MT293161.1 Severe acute respiratory syndrome coronavirus 2 isolate SARS-CoV-2/human/USA/WA-UW-1329/2020, complete genome
170	>MT293160.1 Severe acute respiratory syndrome coronavirus 2 isolate SARS-CoV-2/human/USA/WA-UW-1315/2020, complete genome
171	>MT293159.1 Severe acute respiratory syndrome coronavirus 2 isolate SARS-CoV-2/human/USA/WA-UW-1304/2020, complete genome
172	>MT293158.1 Severe acute respiratory syndrome coronavirus 2 isolate SARS-CoV-2/human/USA/WA-UW-1271/2020, complete genome
173	>MT293156.1 Severe acute respiratory syndrome coronavirus 2 isolate SARS-CoV-2/human/USAWA-UW391/2020, complete genome
174	>MT263469.1 Severe acute respiratory syndrome coronavirus 2 isolate SARS-CoV-2/human/USA/WA-UW389/2020, complete genome
175	>MT263468.1 Severe acute respiratory syndrome coronavirus 2 isolate SARS-CoV-2/human/USA/WA-UW388/2020, complete genome
176	>MT263467.1 Severe acute respiratory syndrome coronavirus 2 isolate SARS-CoV-2/human/USA/WA-UW387/2020, complete genome
177	>MT263465.1 Severe acute respiratory syndrome coronavirus 2 isolate SARS-CoV-2/human/USA/WA-UW385/2020, complete genome
178	>MT263464.1 Severe acute respiratory syndrome coronavirus 2 isolate SARS-CoV-2/human/USA/WA-UW384/2020, complete genome
179	>MT263463.1 Severe acute respiratory syndrome coronavirus 2 isolate SARS-CoV-2/human/USA/CT-UW329/2020, complete genome
180	>MT263462.1 Severe acute respiratory syndrome coronavirus 2 isolate SARS-CoV-2/human/USA/WA-UW383/2020, complete genome
181	>MT263459.1 Severe acute respiratory syndrome coronavirus 2 isolate SARS-CoV-2/human/USA/WA-UW380/2020, complete genome
182	>MT263458.1 Severe acute respiratory syndrome coronavirus 2 isolate SARS-CoV-2/human/USA/WA-UW378/2020, complete genome
183	>MT263457.1 Severe acute respiratory syndrome coronavirus 2 isolate SARS-CoV-2/human/USA/WA-UW390/2020, complete genome
184	>MT263456.1 Severe acute respiratory syndrome coronavirus 2 isolate SARS-CoV-2/human/USA/WA-UW376/2020, complete genome
185	>MT263455.1 Severe acute respiratory syndrome coronavirus 2 isolate SARS-CoV-2/human/USA/WA-UW375/2020, complete genome
186	>MT263454.1 Severe acute respiratory syndrome coronavirus 2 isolate SARS-CoV-2/human/USA/WA-UW374/2020, complete genome
187	>MT263453.1 Severe acute respiratory syndrome coronavirus 2 isolate SARS-CoV-2/human/USA/WA-UW373/2020, complete genome
188	>MT263452.1 Severe acute respiratory syndrome coronavirus 2 isolate SARS-CoV-2/human/USA/WA-UW372/2020, complete genome
189	>MT263451.1 Severe acute respiratory syndrome coronavirus 2 isolate SARS-CoV-2/human/USA/WA-UW371/2020, complete genome
190	>MT263450.1 Severe acute respiratory syndrome coronavirus 2 isolate SARS-CoV-2/human/USA/WA-UW370/2020, complete genome
191	>MT263449.1 Severe acute respiratory syndrome coronavirus 2 isolate SARS-CoV-2/human/USA/WA-UW369/2020, complete genome
192	>MT263448.1 Severe acute respiratory syndrome coronavirus 2 isolate SARS-CoV-2/human/USA/WA-UW368/2020, complete genome
193	>MT263447.1 Severe acute respiratory syndrome coronavirus 2 isolate SARS-CoV-2/human/USA/WA-UW367/2020, complete genome
194	>MT263446.1 Severe acute respiratory syndrome coronavirus 2 isolate SARS-CoV-2/human/USA/WA-UW366/2020, complete genome
195	>MT263445.1 Severe acute respiratory syndrome coronavirus 2 isolate SARS-CoV-2/human/USA/WA-UW365/2020, complete genome
196	>MT263444.1 Severe acute respiratory syndrome coronavirus 2 isolate SARS-CoV-2/human/USA/WA-UW364/2020, complete genome
197	>MT263443.1 Severe acute respiratory syndrome coronavirus 2 isolate SARS-CoV-2/human/USA/WA-UW363/2020, complete genome
198	>MT263442.1 Severe acute respiratory syndrome coronavirus 2 isolate SARS-CoV-2/human/USA/WA-UW362/2020, complete genome
199	>MT263441.1 Severe acute respiratory syndrome coronavirus 2 isolate SARS-CoV-2/human/USA/WA-UW361/2020, complete genome
200	>MT263440.1 Severe acute respiratory syndrome coronavirus 2 isolate SARS-CoV-2/human/USA/WA-UW360/2020, complete genome
201	>MT263439.1 Severe acute respiratory syndrome coronavirus 2 isolate SARS-CoV-2/human/USA/WA-UW359/2020, complete genome
202	>MT263438.1 Severe acute respiratory syndrome coronavirus 2 isolate SARS-CoV-2/human/USA/WA-UW358/2020, complete genome
203	>MT263437.1 Severe acute respiratory syndrome coronavirus 2 isolate SARS-CoV-2/human/USA/WA-UW357/2020, complete genome
204	>MT263436.1 Severe acute respiratory syndrome coronavirus 2 isolate SARS-CoV-2/human/USA/WA-UW356/2020, complete genome
205	>MT263435.1 Severe acute respiratory syndrome coronavirus 2 isolate SARS-CoV-2/human/USA/WA-UW355/2020, complete genome
206	>MT263434.1 Severe acute respiratory syndrome coronavirus 2 isolate SARS-CoV-2/human/USA/WA-UW354/2020, complete genome
207	>MT263433.1 Severe acute respiratory syndrome coronavirus 2 isolate SARS-CoV-2/human/USA/IL-UW353/2020, complete genome
208	>MT263432.1 Severe acute respiratory syndrome coronavirus 2 isolate SARS-CoV-2/human/USA/WA-UW352/2020, complete genome
209	>MT263431.1 Severe acute respiratory syndrome coronavirus 2 isolate SARS-CoV-2/human/USA/WA-UW351/2020, complete genome
210	>MT263430.1 Severe acute respiratory syndrome coronavirus 2 isolate SARS-CoV-2/human/USA/WA-UW350/2020, complete genome
211	>MT263429.1 Severe acute respiratory syndrome coronavirus 2 isolate SARS-CoV-2/human/USA/IL-UW349/2020, complete genome
212	>MT263428.1 Severe acute respiratory syndrome coronavirus 2 isolate SARS-CoV-2/human/USA/IL-UW348/2020, complete genome
213	>MT263426.1 Severe acute respiratory syndrome coronavirus 2 isolate SARS-CoV-2/human/USA/WA-UW346/2020, complete genome
214	>MT263425.1 Severe acute respiratory syndrome coronavirus 2 isolate SARS-CoV-2/human/USA/WA-UW345/2020, complete genome
215	>MT263424.1 Severe acute respiratory syndrome coronavirus 2 isolate SARS-CoV-2/human/USA/WA-UW344/2020, complete genome
216	>MT263423.1 Severe acute respiratory syndrome coronavirus 2 isolate SARS-CoV-2/human/USA/WA-UW343/2020, complete genome
217	>MT263422.1 Severe acute respiratory syndrome coronavirus 2 isolate SARS-CoV-2/human/USA/WA-UW342/2020, complete genome
218	>MT263421.1 Severe acute respiratory syndrome coronavirus 2 isolate SARS-CoV-2/human/USA/WA-UW341/2020, complete genome
219	>MT263420.1 Severe acute respiratory syndrome coronavirus 2 isolate SARS-CoV-2/human/USA/WA-UW340/2020, complete genome
220	>MT263419.1 Severe acute respiratory syndrome coronavirus 2 isolate SARS-CoV-2/human/USA/WA-UW339/2020, complete genome
221	>MT263418.1 Severe acute respiratory syndrome coronavirus 2 isolate SARS-CoV-2/human/USA/WA-UW338/2020, complete genome
222	>MT263417.1 Severe acute respiratory syndrome coronavirus 2 isolate SARS-CoV-2/human/USA/WA-UW337/2020, complete genome
223	>MT263416.1 Severe acute respiratory syndrome coronavirus 2 isolate SARS-CoV-2/human/USA/WA-UW336/2020, complete genome
224	>MT263415.1 Severe acute respiratory syndrome coronavirus 2 isolate SARS-CoV-2/human/USA/MN-UW335/2020, complete genome
225	>MT263414.1 Severe acute respiratory syndrome coronavirus 2 isolate SARS-CoV-2/human/USA/WA-UW334/2020, complete genome
226	>MT263413.1 Severe acute respiratory syndrome coronavirus 2 isolate SARS-CoV-2/human/USA/WA-UW333/2020, complete genome
227	>MT263412.1 Severe acute respiratory syndrome coronavirus 2 isolate SARS-CoV-2/human/USA/WA-UW332/2020, complete genome
228	>MT263411.1 Severe acute respiratory syndrome coronavirus 2 isolate SARS-CoV-2/human/USA/CT-UW331/2020, complete genome
229	>MT263410.1 Severe acute respiratory syndrome coronavirus 2 isolate SARS-CoV-2/human/USA/WA-UW330/2020, complete genome
230	>MT263408.1 Severe acute respiratory syndrome coronavirus 2 isolate SARS-CoV-2/human/USA/WA-UW328/2020, complete genome
231	>MT263406.1 Severe acute respiratory syndrome coronavirus 2 isolate SARS-CoV-2/human/USA/MN-UW326/2020, complete genome
232	>MT263405.1 Severe acute respiratory syndrome coronavirus 2 isolate SARS-CoV-2/human/USA/WA-UW325/2020, complete genome
233	>MT263404.1 Severe acute respiratory syndrome coronavirus 2 isolate SARS-CoV-2/human/USA/WA-UW324/2020, complete genome
234	>MT263403.1 Severe acute respiratory syndrome coronavirus 2 isolate SARS-CoV-2/human/USA/WA-UW323/2020, complete genome
235	>MT263402.1 Severe acute respiratory syndrome coronavirus 2 isolate SARS-CoV-2/human/USA/WA-UW322/2020, complete genome
236	>MT263400.1 Severe acute respiratory syndrome coronavirus 2 isolate SARS-CoV-2/human/USA/WA-UW320/2020, complete genome
237	>MT263399.1 Severe acute respiratory syndrome coronavirus 2 isolate SARS-CoV-2/human/USA/WA-UW319/2020, complete genome
238	>MT263398.1 Severe acute respiratory syndrome coronavirus 2 isolate SARS-CoV-2/human/USA/WA-UW317/2020, complete genome
239	>MT263396.1 Severe acute respiratory syndrome coronavirus 2 isolate SARS-CoV-2/human/USA/WA-UW315/2020, complete genome
240	>MT263395.1 Severe acute respiratory syndrome coronavirus 2 isolate SARS-CoV-2/human/USA/WA-UW314/2020, complete genome
241	>MT263394.1 Severe acute respiratory syndrome coronavirus 2 isolate SARS-CoV-2/human/USA/WA-UW313/2020, complete genome
242	>MT263392.1 Severe acute respiratory syndrome coronavirus 2 isolate SARS-CoV-2/human/USA/WA-UW310/2020, complete genome
243	>MT263391.1 Severe acute respiratory syndrome coronavirus 2 isolate SARS-CoV-2/human/USA/WA-UW308/2020, complete genome
244	>MT263390.1 Severe acute respiratory syndrome coronavirus 2 isolate SARS-CoV-2/human/USA/WA-UW307/2020, complete genome
245	>MT263388.1 Severe acute respiratory syndrome coronavirus 2 isolate SARS-CoV-2/human/USA/WA-UW305/2020, complete genome
246	>MT263387.1 Severe acute respiratory syndrome coronavirus 2 isolate SARS-CoV-2/human/USA/WA-UW304/2020, complete genome
247	>MT263386.1 Severe acute respiratory syndrome coronavirus 2 isolate SARS-CoV-2/human/USA/CT-UW303/2020, complete genome
248	>MT263384.1 Severe acute respiratory syndrome coronavirus 2 isolate SARS-CoV-2/human/USA/WA-UW301/2020, complete genome
249	>MT263383.1 Severe acute respiratory syndrome coronavirus 2 isolate SARS-CoV-2/human/USA/WA-UW300/2020, complete genome
250	>MT263382.1 Severe acute respiratory syndrome coronavirus 2 isolate SARS-CoV-2/human/USA/WA-UW299/2020, complete genome
251	>MT263381.1 Severe acute respiratory syndrome coronavirus 2 isolate SARS-CoV-2/human/USA/WA-UW298/2020, complete genome
252	>MT259287.1 Severe acute respiratory syndrome coronavirus 2 isolate SARS-CoV-2/human/USA/WA-UW297/2020, complete genome
253	>MT259286.1 Severe acute respiratory syndrome coronavirus 2 isolate SARS-CoV-2/human/USA/WA-UW296/2020, complete genome
254	>MT259285.1 Severe acute respiratory syndrome coronavirus 2 isolate SARS-CoV-2/human/USA/WA-UW295/2020, complete genome
255	>MT259284.1 Severe acute respiratory syndrome coronavirus 2 isolate SARS-CoV-2/human/USA/WA-UW294/2020, complete genome
256	>MT259282.1 Severe acute respiratory syndrome coronavirus 2 isolate SARS-CoV-2/human/USA/WA-UW292/2020, complete genome
257	>MT259281.1 Severe acute respiratory syndrome coronavirus 2 isolate SARS-CoV-2/human/USA/WA-UW291/2020, complete genome
258	>MT259280.1 Severe acute respiratory syndrome coronavirus 2 isolate SARS-CoV-2/human/USA/WA-UW290/2020, complete genome
259	>MT259278.1 Severe acute respiratory syndrome coronavirus 2 isolate SARS-CoV-2/human/USA/WA-UW288/2020, complete genome
260	>MT259277.1 Severe acute respiratory syndrome coronavirus 2 isolate SARS-CoV-2/human/USA/WA-UW287/2020, complete genome
261	>MT259275.1 Severe acute respiratory syndrome coronavirus 2 isolate SARS-CoV-2/human/USA/WA-UW285/2020, complete genome
262	>MT259274.1 Severe acute respiratory syndrome coronavirus 2 isolate SARS-CoV-2/human/USA/WA-UW284/2020, complete genome
263	>MT259273.1 Severe acute respiratory syndrome coronavirus 2 isolate SARS-CoV-2/human/USA/WA-UW282/2020, complete genome
264	>MT259271.1 Severe acute respiratory syndrome coronavirus 2 isolate SARS-CoV-2/human/USA/WA-UW279/2020, complete genome
265	>MT259269.1 Severe acute respiratory syndrome coronavirus 2 isolate SARS-CoV-2/human/USA/WA-UW277/2020, complete genome
266	>MT259268.1 Severe acute respiratory syndrome coronavirus 2 isolate SARS-CoV-2/human/USA/WA-UW276/2020, complete genome
267	>MT259267.1 Severe acute respiratory syndrome coronavirus 2 isolate SARS-CoV-2/human/USA/WA-UW275/2020, complete genome
268	>MT259266.1 Severe acute respiratory syndrome coronavirus 2 isolate SARS-CoV-2/human/USA/WA-UW274/2020, complete genome
269	>MT259264.1 Severe acute respiratory syndrome coronavirus 2 isolate SARS-CoV-2/human/USA/WA-UW272/2020, complete genome
270	>MT259263.1 Severe acute respiratory syndrome coronavirus 2 isolate SARS-CoV-2/human/USA/WA-UW271/2020, complete genome
271	>MT259261.1 Severe acute respiratory syndrome coronavirus 2 isolate SARS-CoV-2/human/USA/WA-UW269/2020, complete genome
272	>MT259260.1 Severe acute respiratory syndrome coronavirus 2 isolate SARS-CoV-2/human/USA/WA-UW268/2020, complete genome
273	>MT259258.1 Severe acute respiratory syndrome coronavirus 2 isolate SARS-CoV-2/human/USA/MN-UW266/2020, complete genome
274	>MT259257.1 Severe acute respiratory syndrome coronavirus 2 isolate SARS-CoV-2/human/USA/WA-UW265/2020, complete genome
275	>MT259256.1 Severe acute respiratory syndrome coronavirus 2 isolate SARS-CoV-2/human/USA/WA-UW264/2020, complete genome
276	>MT259254.1 Severe acute respiratory syndrome coronavirus 2 isolate SARS-CoV-2/human/USA/WA-UW262/2020, complete genome
277	>MT259253.1 Severe acute respiratory syndrome coronavirus 2 isolate SARS-CoV-2/human/USA/WA-UW261/2020, complete genome
278	>MT259252.1 Severe acute respiratory syndrome coronavirus 2 isolate SARS-CoV-2/human/USA/WA-UW260/2020, complete genome
279	>MT259251.1 Severe acute respiratory syndrome coronavirus 2 isolate SARS-CoV-2/human/USA/WA-UW259/2020, complete genome
280	>MT259250.1 Severe acute respiratory syndrome coronavirus 2 isolate SARS-CoV-2/human/USA/WA-UW258/2020, complete genome
281	>MT259249.1 Severe acute respiratory syndrome coronavirus 2 isolate SARS-CoV-2/human/USA/WA-UW257/2020, complete genome
282	>MT259248.1 Severe acute respiratory syndrome coronavirus 2 isolate SARS-CoV-2/human/USA/CT-UW256/2020, complete genome
283	>MT259247.1 Severe acute respiratory syndrome coronavirus 2 isolate SARS-CoV-2/human/USA/WA-UW255/2020, complete genome
284	>MT259246.1 Severe acute respiratory syndrome coronavirus 2 isolate SARS-CoV-2/human/USA/WA-UW254/2020, complete genome
285	>MT259245.1 Severe acute respiratory syndrome coronavirus 2 isolate SARS-CoV-2/human/USA/WA-UW253/2020, complete genome
286	>MT259244.1 Severe acute respiratory syndrome coronavirus 2 isolate SARS-CoV-2/human/USA/WA-UW252/2020, complete genome
287	>MT259243.1 Severe acute respiratory syndrome coronavirus 2 isolate SARS-CoV-2/human/USA/WA-UW251/2020, complete genome
288	>MT259241.1 Severe acute respiratory syndrome coronavirus 2 isolate SARS-CoV-2/human/USA/WA-UW249/2020, complete genome
289	>MT259239.1 Severe acute respiratory syndrome coronavirus 2 isolate SARS-CoV-2/human/USA/WA-UW247/2020, complete genome
290	>MT259237.1 Severe acute respiratory syndrome coronavirus 2 isolate SARS-CoV-2/human/USA/WA-UW245/2020, complete genome
291	>MT259236.1 Severe acute respiratory syndrome coronavirus 2 isolate SARS-CoV-2/human/USA/WA-UW244/2020, complete genome
292	>MT259235.1 Severe acute respiratory syndrome coronavirus 2 isolate SARS-CoV-2/human/USA/WA-UW243/2020, complete genome
293	>MT251980.1 Severe acute respiratory syndrome coronavirus 2 isolate SARS-CoV-2/human/USA/WA-UW242/2020, complete genome
294	>MT251979.1 Severe acute respiratory syndrome coronavirus 2 isolate SARS-CoV-2/human/USA/WA-UW241/2020, complete genome
295	>MT251978.1 Severe acute respiratory syndrome coronavirus 2 isolate SARS-CoV-2/human/USA/WA-UW235/2020, complete genome
296	>MT251977.1 Severe acute respiratory syndrome coronavirus 2 isolate SARS-CoV-2/human/USA/WA-UW234/2020, complete genome
297	>MT251976.1 Severe acute respiratory syndrome coronavirus 2 isolate SARS-CoV-2/human/USA/WA-UW240/2020, complete genome
298	>MT251975.1 Severe acute respiratory syndrome coronavirus 2 isolate SARS-CoV-2/human/USA/WA-UW239/2020, complete genome
299	>MT251974.1 Severe acute respiratory syndrome coronavirus 2 isolate SARS-CoV-2/human/USA/CT-UW238/2020, complete genome
300	>MT251973.1 Severe acute respiratory syndrome coronavirus 2 isolate SARS-CoV-2/human/USA/WA-UW237/2020, complete genome
301	>MT251972.1 Severe acute respiratory syndrome coronavirus 2 isolate SARS-CoV-2/human/USA/WA-UW236/2020, complete genome
302	>MT334561.1 Severe acute respiratory syndrome coronavirus 2 isolate SARS-CoV-2/human/USA/UT-00301/2020, complete genome
303	>MT334557.1 Severe acute respiratory syndrome coronavirus 2 isolate SARS-CoV-2/human/USA/UT-00290/2020, complete genome
304	>MT334547.1 Severe acute respiratory syndrome coronavirus 2 isolate SARS-CoV-2/human/USA/UT-00033/2020, complete genome
305	>MT334546.1 Severe acute respiratory syndrome coronavirus 2 isolate SARS-CoV-2/human/USA/UT-00032/2020, complete genome
306	>MT334544.1 Severe acute respiratory syndrome coronavirus 2 isolate SARS-CoV-2/human/USA/UT-00028/2020, complete genome
307	>MT334542.1 Severe acute respiratory syndrome coronavirus 2 isolate SARS-CoV-2/human/USA/UT-00025/2020, complete genome
308	>MT334541.1 Severe acute respiratory syndrome coronavirus 2 isolate SARS-CoV-2/human/USA/UT-00023/2020, complete genome
309	>MT334540.1 Severe acute respiratory syndrome coronavirus 2 isolate SARS-CoV-2/human/USA/UT-00022/2020, complete genome
310	>MT334539.1 Severe acute respiratory syndrome coronavirus 2 isolate SARS-CoV-2/human/USA/UT-00021/2020, complete genome
311	>MT334538.1 Severe acute respiratory syndrome coronavirus 2 isolate SARS-CoV-2/human/USA/UT-00020/2020, complete genome
312	>MT334537.1 Severe acute respiratory syndrome coronavirus 2 isolate SARS-CoV-2/human/USA/UT-00019/2020, complete genome
313	>MT334536.1 Severe acute respiratory syndrome coronavirus 2 isolate SARS-CoV-2/human/USA/UT-00017/2020, complete genome
314	>MT334535.1 Severe acute respiratory syndrome coronavirus 2 isolate SARS-CoV-2/human/USA/UT-00016/2020, complete genome
315	>MT334534.1 Severe acute respiratory syndrome coronavirus 2 isolate SARS-CoV-2/human/USA/UT-00015/2020, complete genome
316	>MT334533.1 Severe acute respiratory syndrome coronavirus 2 isolate SARS-CoV-2/human/USA/UT-00014/2020, complete genome
317	>MT334531.1 Severe acute respiratory syndrome coronavirus 2 isolate SARS-CoV-2/human/USA/UT-00012/2020, complete genome
318	>MT334529.1 Severe acute respiratory syndrome coronavirus 2 isolate SARS-CoV-2/human/USA/UT-00010/2020, complete genome
319	>MT334526.1 Severe acute respiratory syndrome coronavirus 2 isolate SARS-CoV-2/human/USA/UT-00006/2020, complete genome
320	>MT334523.1 Severe acute respiratory syndrome coronavirus 2 isolate SARS-CoV-2/human/USA/UT-00003/2020, complete genome
321	>MT328035.1 Severe acute respiratory syndrome coronavirus 2 isolate SARS-CoV-2/human/GRC/13/2020, complete genome
322	>MT328034.1 Severe acute respiratory syndrome coronavirus 2 isolate SARS-CoV-2/human/GRC/16/2020, complete genome
323	>MT328033.1 Severe acute respiratory syndrome coronavirus 2 isolate SARS-CoV-2/human/GRC/12/2020, complete genome
324	>MT328032.1 Severe acute respiratory syndrome coronavirus 2 isolate SARS-CoV-2/human/GRC/10/2020, complete genome
325	>MT327745.1 Severe acute respiratory syndrome coronavirus 2 isolate SARS-CoV-2/human/TUR/ERAGEM-001/2020, complete genome
326	>MT325640.1 Severe acute respiratory syndrome coronavirus 2 isolate SARS-CoV-2/human/USA/MA_3653/2020, complete genome
327	>MT325639.1 Severe acute respiratory syndrome coronavirus 2 isolate SARS-CoV-2/human/USA/MA_3642/2020, complete genome
328	>MT325638.1 Severe acute respiratory syndrome coronavirus 2 isolate SARS-CoV-2/human/USA/MA_3626/2020, complete genome
329	>MT325637.1 Severe acute respiratory syndrome coronavirus 2 isolate SARS-CoV-2/human/USA/MA_3616/2020, complete genome
330	>MT325636.1 Severe acute respiratory syndrome coronavirus 2 isolate SARS-CoV-2/human/USA/MA_3614/2020, complete genome
331	>MT325635.1 Severe acute respiratory syndrome coronavirus 2 isolate SARS-CoV-2/human/USA/MA_2652/2020, complete genome
332	>MT325634.1 Severe acute respiratory syndrome coronavirus 2 isolate SARS-CoV-2/human/USA/MA_1355/2020, complete genome
333	>MT325633.1 Severe acute respiratory syndrome coronavirus 2 isolate SARS-CoV-2/human/USA/MA_9889/2020, complete genome
334	>MT325632.1 Severe acute respiratory syndrome coronavirus 2 isolate SARS-CoV-2/human/USA/MA_9704/2020, complete genome
335	>MT325631.1 Severe acute respiratory syndrome coronavirus 2 isolate SARS-CoV-2/human/USA/MA_9703/2020, complete genome
336	>MT325630.1 Severe acute respiratory syndrome coronavirus 2 isolate SARS-CoV-2/human/USA/MA_8933/2020, complete genome
337	>MT325629.1 Severe acute respiratory syndrome coronavirus 2 isolate SARS-CoV-2/human/USA/MA_8932/2020, complete genome
338	>MT325628.1 Severe acute respiratory syndrome coronavirus 2 isolate SARS-CoV-2/human/USA/VA_6171/2020, complete genome
339	>MT325627.1 Severe acute respiratory syndrome coronavirus 2 isolate SARS-CoV-2/human/USA/NY_1922/2020, complete genome
340	>MT325626.1 Severe acute respiratory syndrome coronavirus 2 isolate SARS-CoV-2/human/USA/SC_3572/2020, complete genome
341	>MT325625.1 Severe acute respiratory syndrome coronavirus 2 isolate SARS-CoV-2/human/USA/SC_3571/2020, complete genome
342	>MT325624.1 Severe acute respiratory syndrome coronavirus 2 isolate SARS-CoV-2/human/USA/SC_3570/2020, complete genome
343	>MT325623.1 Severe acute respiratory syndrome coronavirus 2 isolate SARS-CoV-2/human/USA/SC_3520/2020, complete genome
344	>MT325622.1 Severe acute respiratory syndrome coronavirus 2 isolate SARS-CoV-2/human/USA/NJ_3201/2020, complete genome
345	>MT325621.1 Severe acute respiratory syndrome coronavirus 2 isolate SARS-CoV-2/human/USA/IA_6390/2020, complete genome
346	>MT325620.1 Severe acute respiratory syndrome coronavirus 2 isolate SARS-CoV-2/human/USA/IA_6399/2020, complete genome
347	>MT325619.1 Severe acute respiratory syndrome coronavirus 2 isolate SARS-CoV-2/human/USA/IA_6401/2020, complete genome
348	>MT325618.1 Severe acute respiratory syndrome coronavirus 2 isolate SARS-CoV-2/human/USA/IA_6395/2020, complete genome
349	>MT325617.1 Severe acute respiratory syndrome coronavirus 2 isolate SARS-CoV-2/human/USA/IA_6396/2020, complete genome
350	>MT325616.1 Severe acute respiratory syndrome coronavirus 2 isolate SARS-CoV-2/human/USA/MA_3623/2020, complete genome
351	>MT325615.1 Severe acute respiratory syndrome coronavirus 2 isolate SARS-CoV-2/human/USA/IA_6391/2020, complete genome
352	>MT325614.1 Severe acute respiratory syndrome coronavirus 2 isolate SARS-CoV-2/human/USA/VA_6389/2020, complete genome
353	>MT325613.1 Severe acute respiratory syndrome coronavirus 2 isolate SARS-CoV-2/human/USA/VA_6382/2020, complete genome
354	>MT325612.1 Severe acute respiratory syndrome coronavirus 2 isolate SARS-CoV-2/human/USA/VA_6377/2020, complete genome
355	>MT325611.1 Severe acute respiratory syndrome coronavirus 2 isolate SARS-CoV-2/human/USA/VA_6352/2020, complete genome
356	>MT325610.1 Severe acute respiratory syndrome coronavirus 2 isolate SARS-CoV-2/human/USA/UT_8906/2020, complete genome
357	>MT325609.1 Severe acute respiratory syndrome coronavirus 2 isolate SARS-CoV-2/human/USA/UT_8199/2020, complete genome
358	>MT325608.1 Severe acute respiratory syndrome coronavirus 2 isolate SARS-CoV-2/human/USA/SC_6370/2020, complete genome
359	>MT325607.1 Severe acute respiratory syndrome coronavirus 2 isolate SARS-CoV-2/human/USA/SC_3575/2020, complete genome
360	>MT325606.1 Severe acute respiratory syndrome coronavirus 2 isolate SARS-CoV-2/human/USA/SC_3569/2020, complete genome
361	>MT325605.1 Severe acute respiratory syndrome coronavirus 2 isolate SARS-CoV-2/human/USA/RI_0702/2020, complete genome
362	>MT325604.1 Severe acute respiratory syndrome coronavirus 2 isolate SARS-CoV-2/human/USA/PA_4405/2020, complete genome
363	>MT325603.1 Severe acute respiratory syndrome coronavirus 2 isolate SARS-CoV-2/human/USA/PA_4395/2020, complete genome
364	>MT325602.1 Severe acute respiratory syndrome coronavirus 2 isolate SARS-CoV-2/human/USA/PA_2937/2020, complete genome
365	>MT325601.1 Severe acute respiratory syndrome coronavirus 2 isolate SARS-CoV-2/human/USA/PA_2317/2020, complete genome
366	>MT325600.1 Severe acute respiratory syndrome coronavirus 2 isolate SARS-CoV-2/human/USA/PA_1881/2020, complete genome
367	>MT325599.1 Severe acute respiratory syndrome coronavirus 2 isolate SARS-CoV-2/human/USA/PA_1802/2020, complete genome
368	>MT325598.1 Severe acute respiratory syndrome coronavirus 2 isolate SARS-CoV-2/human/USA/OH_0023/2020, complete genome
369	>MT325597.1 Severe acute respiratory syndrome coronavirus 2 isolate SARS-CoV-2/human/USA/NV_0052/2020, complete genome
370	>MT325596.1 Severe acute respiratory syndrome coronavirus 2 isolate SARS-CoV-2/human/USA/NJ_3592/2020, complete genome
371	>MT325595.1 Severe acute respiratory syndrome coronavirus 2 isolate SARS-CoV-2/human/USA/NH_0033/2020, complete genome
372	>MT325594.1 Severe acute respiratory syndrome coronavirus 2 isolate SARS-CoV-2/human/USA/NH_0029/2020, complete genome
373	>MT325593.1 Severe acute respiratory syndrome coronavirus 2 isolate SARS-CoV-2/human/USA/NE_7025/2020, complete genome
374	>MT325592.1 Severe acute respiratory syndrome coronavirus 2 isolate SARS-CoV-2/human/USA/NE_6605/2020, complete genome
375	>MT325591.1 Severe acute respiratory syndrome coronavirus 2 isolate SARS-CoV-2/human/USA/NC_6999/2020, complete genome
376	>MT325590.1 Severe acute respiratory syndrome coronavirus 2 isolate SARS-CoV-2/human/USA/NC_0031/2020, complete genome
377	>MT325589.1 Severe acute respiratory syndrome coronavirus 2 isolate SARS-CoV-2/human/USA/NC_0024/2020, complete genome
378	>MT325588.1 Severe acute respiratory syndrome coronavirus 2 isolate SARS-CoV-2/human/USA/MO_4470/2020, complete genome
379	>MT325587.1 Severe acute respiratory syndrome coronavirus 2 isolate SARS-CoV-2/human/USA/MD_0026/2020, complete genome
380	>MT325586.1 Severe acute respiratory syndrome coronavirus 2 isolate SARS-CoV-2/human/USA/MA_4811/2020, complete genome
381	>MT325585.1 Severe acute respiratory syndrome coronavirus 2 isolate SARS-CoV-2/human/USA/MA_3878/2020, complete genome
382	>MT325584.1 Severe acute respiratory syndrome coronavirus 2 isolate SARS-CoV-2/human/USA/MA_3699/2020, complete genome
383	>MT325583.1 Severe acute respiratory syndrome coronavirus 2 isolate SARS-CoV-2/human/USA/MA_3672/2020, complete genome
384	>MT325582.1 Severe acute respiratory syndrome coronavirus 2 isolate SARS-CoV-2/human/USA/MA_0020/2020, complete genome
385	>MT325581.1 Severe acute respiratory syndrome coronavirus 2 isolate SARS-CoV-2/human/USA/LA_0842/2020, complete genome
386	>MT325580.1 Severe acute respiratory syndrome coronavirus 2 isolate SARS-CoV-2/human/USA/KS_4126/2020, complete genome
387	>MT325579.1 Severe acute respiratory syndrome coronavirus 2 isolate SARS-CoV-2/human/USA/IN_2001/2020, complete genome
388	>MT325578.1 Severe acute respiratory syndrome coronavirus 2 isolate SARS-CoV-2/human/USA/IL_0089/2020, complete genome
389	>MT325577.1 Severe acute respiratory syndrome coronavirus 2 isolate SARS-CoV-2/human/USA/IL_0087/2020, complete genome
390	>MT325576.1 Severe acute respiratory syndrome coronavirus 2 isolate SARS-CoV-2/human/USA/IA_6394/2020, complete genome
391	>MT325575.1 Severe acute respiratory syndrome coronavirus 2 isolate SARS-CoV-2/human/USA/GA_2343/2020, complete genome
392	>MT325574.1 Severe acute respiratory syndrome coronavirus 2 isolate SARS-CoV-2/human/USA/GA_2185/2020, complete genome
393	>MT325573.1 Severe acute respiratory syndrome coronavirus 2 isolate SARS-CoV-2/human/USA/GA_2120/2020, complete genome
394	>MT325572.1 Severe acute respiratory syndrome coronavirus 2 isolate SARS-CoV-2/human/USA/GA_2118/2020, complete genome
395	>MT325571.1 Severe acute respiratory syndrome coronavirus 2 isolate SARS-CoV-2/human/USA/GA_2055/2020, complete genome
396	>MT325570.1 Severe acute respiratory syndrome coronavirus 2 isolate SARS-CoV-2/human/USA/GA_1847/2020, complete genome
397	>MT325569.1 Severe acute respiratory syndrome coronavirus 2 isolate SARS-CoV-2/human/USA/GA_1621/2020, complete genome
398	>MT325568.1 Severe acute respiratory syndrome coronavirus 2 isolate SARS-CoV-2/human/USA/FL_9656/2020, complete genome
399	>MT325567.1 Severe acute respiratory syndrome coronavirus 2 isolate SARS-CoV-2/human/USA/FL_9655/2020, complete genome
400	>MT325566.1 Severe acute respiratory syndrome coronavirus 2 isolate SARS-CoV-2/human/USA/FL_9590/2020, complete genome
401	>MT325565.1 Severe acute respiratory syndrome coronavirus 2 isolate SARS-CoV-2/human/USA/FL_7169/2020, complete genome
402	>MT325564.1 Severe acute respiratory syndrome coronavirus 2 isolate SARS-CoV-2/human/USA/FL_1177/2020, complete genome
403	>MT325563.1 Severe acute respiratory syndrome coronavirus 2 isolate SARS-CoV-2/human/USA/DC_0004/2020, complete genome
404	>MT325562.1 Severe acute respiratory syndrome coronavirus 2 isolate SARS-CoV-2/human/USA/AZ_8135/2020, complete genome
405	>MT325561.1 Severe acute respiratory syndrome coronavirus 2 isolate SARS-CoV-2/human/USA/AZ_8132/2020, complete genome
406	>MT326191.1 Severe acute respiratory syndrome coronavirus 2 isolate SARS-CoV-2/human/USA/WA-UW-1422/2020, complete genome
407	>MT326190.1 Severe acute respiratory syndrome coronavirus 2 isolate SARS-CoV-2/human/USA/WA-UW-1436/2020, complete genome
408	>MT326187.1 Severe acute respiratory syndrome coronavirus 2 isolate SARS-CoV-2/human/USA/WA-UW-1294/2020, complete genome
409	>MT326185.1 Severe acute respiratory syndrome coronavirus 2 isolate SARS-CoV-2/human/USA/WA-UW-1342/2020, complete genome
410	>MT326184.1 Severe acute respiratory syndrome coronavirus 2 isolate SARS-CoV-2/human/USA/WA-UW-1472/2020, complete genome
411	>MT326181.1 Severe acute respiratory syndrome coronavirus 2 isolate SARS-CoV-2/human/USA/IL-UW-1311/2020, complete genome
412	>MT326180.1 Severe acute respiratory syndrome coronavirus 2 isolate SARS-CoV-2/human/USA/WA-UW-1575/2020, complete genome
413	>MT326178.1 Severe acute respiratory syndrome coronavirus 2 isolate SARS-CoV-2/human/USA/WA-UW-1595/2020, complete genome
414	>MT326173.1 Severe acute respiratory syndrome coronavirus 2 isolate SARS-CoV-2/human/USA/UNKNOWN-UW-1773/2020, complete genome
415	>MT326169.1 Severe acute respiratory syndrome coronavirus 2 isolate SARS-CoV-2/human/USA/WA-UW-1770/2020, complete genome
416	>MT326167.1 Severe acute respiratory syndrome coronavirus 2 isolate SARS-CoV-2/human/USA/WA-UW-1753/2020, complete genome
417	>MT326166.1 Severe acute respiratory syndrome coronavirus 2 isolate SARS-CoV-2/human/USA/WA-UW-1735/2020, complete genome
418	>MT326164.1 Severe acute respiratory syndrome coronavirus 2 isolate SARS-CoV-2/human/USA/WA-UW-1750/2020, complete genome
419	>MT326162.1 Severe acute respiratory syndrome coronavirus 2 isolate SARS-CoV-2/human/USA/WA-UW-1739/2020, complete genome
420	>MT326161.1 Severe acute respiratory syndrome coronavirus 2 isolate SARS-CoV-2/human/USA/WA-UW-1732/2020, complete genome
421	>MT326160.1 Severe acute respiratory syndrome coronavirus 2 isolate SARS-CoV-2/human/USA/WA-UW-1733/2020, complete genome
422	>MT326159.1 Severe acute respiratory syndrome coronavirus 2 isolate SARS-CoV-2/human/USA/WA-UW-1722/2020, complete genome
423	>MT326158.1 Severe acute respiratory syndrome coronavirus 2 isolate SARS-CoV-2/human/USA/WA-UW-1772/2020, complete genome
424	>MT326154.1 Severe acute respiratory syndrome coronavirus 2 isolate SARS-CoV-2/human/USA/WA-UW-1724/2020, complete genome
425	>MT326153.1 Severe acute respiratory syndrome coronavirus 2 isolate SARS-CoV-2/human/USA/WA-UW-1702/2020, complete genome
426	>MT326152.1 Severe acute respiratory syndrome coronavirus 2 isolate SARS-CoV-2/human/USA/WA-UW-1706/2020, complete genome
427	>MT326151.1 Severe acute respiratory syndrome coronavirus 2 isolate SARS-CoV-2/human/USA/WA-UW-1705/2020, complete genome
428	>MT326150.1 Severe acute respiratory syndrome coronavirus 2 isolate SARS-CoV-2/human/USA/WA-UW-1707/2020, complete genome
429	>MT326149.1 Severe acute respiratory syndrome coronavirus 2 isolate SARS-CoV-2/human/USA/WA-UW-1745/2020, complete genome
430	>MT326148.1 Severe acute respiratory syndrome coronavirus 2 isolate SARS-CoV-2/human/USA/WA-UW-1744/2020, complete genome
431	>MT326140.1 Severe acute respiratory syndrome coronavirus 2 isolate SARS-CoV-2/human/USA/WA-UW-1680/2020, complete genome
432	>MT326138.1 Severe acute respiratory syndrome coronavirus 2 isolate SARS-CoV-2/human/USA/WA-UW-1670/2020, complete genome
433	>MT326137.1 Severe acute respiratory syndrome coronavirus 2 isolate SARS-CoV-2/human/USA/WA-UW-1715/2020, complete genome
434	>MT326136.1 Severe acute respiratory syndrome coronavirus 2 isolate SARS-CoV-2/human/USA/WA-UW-1689/2020, complete genome
435	>MT326135.1 Severe acute respiratory syndrome coronavirus 2 isolate SARS-CoV-2/human/USA/WA-UW-1718/2020, complete genome
436	>MT326134.1 Severe acute respiratory syndrome coronavirus 2 isolate SARS-CoV-2/human/USA/WA-UW-1765/2020, complete genome
437	>MT326133.1 Severe acute respiratory syndrome coronavirus 2 isolate SARS-CoV-2/human/USA/WA-UW-1712/2020, complete genome
438	>MT326132.1 Severe acute respiratory syndrome coronavirus 2 isolate SARS-CoV-2/human/USA/WA-UW-1716/2020, complete genome
439	>MT326130.1 Severe acute respiratory syndrome coronavirus 2 isolate SARS-CoV-2/human/USA/WA-UW-1697/2020, complete genome
440	>MT326129.1 Severe acute respiratory syndrome coronavirus 2 isolate SARS-CoV-2/human/USA/WA-UW-1698/2020, complete genome
441	>MT326128.1 Severe acute respiratory syndrome coronavirus 2 isolate SARS-CoV-2/human/USA/WA-UW-1652/2020, complete genome
442	>MT326127.1 Severe acute respiratory syndrome coronavirus 2 isolate SARS-CoV-2/human/USA/WA-UW-1651/2020, complete genome
443	>MT326125.1 Severe acute respiratory syndrome coronavirus 2 isolate SARS-CoV-2/human/USA/WA-UW-1723/2020, complete genome
444	>MT326124.1 Severe acute respiratory syndrome coronavirus 2 isolate SARS-CoV-2/human/USA/WA-UW-1672/2020, complete genome
445	>MT326123.1 Severe acute respiratory syndrome coronavirus 2 isolate SARS-CoV-2/human/USA/WA-UW-1656/2020, complete genome
446	>MT326121.1 Severe acute respiratory syndrome coronavirus 2 isolate SARS-CoV-2/human/USA/WA-UW-1666/2020, complete genome
447	>MT326120.1 Severe acute respiratory syndrome coronavirus 2 isolate SARS-CoV-2/human/USA/WA-UW-1726/2020, complete genome
448	>MT326119.1 Severe acute respiratory syndrome coronavirus 2 isolate SARS-CoV-2/human/USA/WA-UW-1661/2020, complete genome
449	>MT326118.1 Severe acute respiratory syndrome coronavirus 2 isolate SARS-CoV-2/human/USA/WA-UW-1728/2020, complete genome
450	>MT326117.1 Severe acute respiratory syndrome coronavirus 2 isolate SARS-CoV-2/human/USA/WA-UW-1688/2020, complete genome
451	>MT326116.1 Severe acute respiratory syndrome coronavirus 2 isolate SARS-CoV-2/human/USA/WA-UW-1683/2020, complete genome
452	>MT326113.1 Severe acute respiratory syndrome coronavirus 2 isolate SARS-CoV-2/human/USA/WA-UW-1646/2020, complete genome
453	>MT326112.1 Severe acute respiratory syndrome coronavirus 2 isolate SARS-CoV-2/human/USA/WA-UW-1644/2020, complete genome
454	>MT326111.1 Severe acute respiratory syndrome coronavirus 2 isolate SARS-CoV-2/human/USA/WA-UW-1822/2020, complete genome
455	>MT326106.1 Severe acute respiratory syndrome coronavirus 2 isolate SARS-CoV-2/human/USA/WA-UW-1831/2020, complete genome
456	>MT326105.1 Severe acute respiratory syndrome coronavirus 2 isolate SARS-CoV-2/human/USA/WA-UW-1828/2020, complete genome
457	>MT326104.1 Severe acute respiratory syndrome coronavirus 2 isolate SARS-CoV-2/human/USA/UNKNOWN-UW-1816/2020, complete genome
458	>MT326103.1 Severe acute respiratory syndrome coronavirus 2 isolate SARS-CoV-2/human/USA/UNKNOWN-UW-1817/2020, complete genome
459	>MT326100.1 Severe acute respiratory syndrome coronavirus 2 isolate SARS-CoV-2/human/USA/WA-UW-1805/2020, complete genome
460	>MT326099.1 Severe acute respiratory syndrome coronavirus 2 isolate SARS-CoV-2/human/USA/WA-UW-1799/2020, complete genome
461	>MT326097.1 Severe acute respiratory syndrome coronavirus 2 isolate SARS-CoV-2/human/USA/WA-UW-1784/2020, complete genome
462	>MT326096.1 Severe acute respiratory syndrome coronavirus 2 isolate SARS-CoV-2/human/USA/WA-UW-1779/2020, complete genome
463	>MT326095.1 Severe acute respiratory syndrome coronavirus 2 isolate SARS-CoV-2/human/USA/WA-UW-1797/2020, complete genome
464	>MT326094.1 Severe acute respiratory syndrome coronavirus 2 isolate SARS-CoV-2/human/USA/WA-UW-1778/2020, complete genome
465	>MT326093.1 Severe acute respiratory syndrome coronavirus 2 isolate SARS-CoV-2/human/USA/WA-UW-1775/2020, complete genome
466	>MT326092.1 Severe acute respiratory syndrome coronavirus 2 isolate SARS-CoV-2/human/USA/WA-UW-1774/2020, complete genome
467	>MT326091.1 Severe acute respiratory syndrome coronavirus 2 isolate SARS-CoV-2/human/USA/UNKNOWN-UW-1832/2020, complete genome
468	>MT326090.1 Severe acute respiratory syndrome coronavirus 2 isolate SARS-CoV-2/human/USA/WA-UW-1796/2020, complete genome
469	>MT326089.1 Severe acute respiratory syndrome coronavirus 2 isolate SARS-CoV-2/human/USA/WA-UW-1792/2020, complete genome
470	>MT326088.1 Severe acute respiratory syndrome coronavirus 2 isolate SARS-CoV-2/human/USA/WA-UW-1840/2020, complete genome
471	>MT326087.1 Severe acute respiratory syndrome coronavirus 2 isolate SARS-CoV-2/human/USA/WA-UW-1801/2020, complete genome
472	>MT326086.1 Severe acute respiratory syndrome coronavirus 2 isolate SARS-CoV-2/human/USA/WA-UW-1785/2020, complete genome
473	>MT326085.1 Severe acute respiratory syndrome coronavirus 2 isolate SARS-CoV-2/human/USA/UNKNOWN-UW-1791/2020, complete genome
474	>MT326084.1 Severe acute respiratory syndrome coronavirus 2 isolate SARS-CoV-2/human/USA/WA-UW-1917/2020, complete genome
475	>MT326083.1 Severe acute respiratory syndrome coronavirus 2 isolate SARS-CoV-2/human/USA/WA-UW-1907/2020, complete genome
476	>MT326082.1 Severe acute respiratory syndrome coronavirus 2 isolate SARS-CoV-2/human/USA/WA-UW-1865/2020, complete genome
477	>MT326081.1 Severe acute respiratory syndrome coronavirus 2 isolate SARS-CoV-2/human/USA/WA-UW-1984/2020, complete genome
478	>MT326078.1 Severe acute respiratory syndrome coronavirus 2 isolate SARS-CoV-2/human/USA/WA-UW-1954/2020, complete genome
479	>MT326076.1 Severe acute respiratory syndrome coronavirus 2 isolate SARS-CoV-2/human/USA/WA-UW-1944/2020, complete genome
480	>MT326075.1 Severe acute respiratory syndrome coronavirus 2 isolate SARS-CoV-2/human/USA/ID-UW-1934/2020, complete genome
481	>MT326074.1 Severe acute respiratory syndrome coronavirus 2 isolate SARS-CoV-2/human/USA/ID-UW-1925/2020, complete genome
482	>MT326071.1 Severe acute respiratory syndrome coronavirus 2 isolate SARS-CoV-2/human/USA/ID-UW-1938/2020, complete genome
483	>MT326070.1 Severe acute respiratory syndrome coronavirus 2 isolate SARS-CoV-2/human/USA/WA-UW-1928/2020, complete genome
484	>MT326069.1 Severe acute respiratory syndrome coronavirus 2 isolate SARS-CoV-2/human/USA/WA-UW-1890/2020, complete genome
485	>MT326068.1 Severe acute respiratory syndrome coronavirus 2 isolate SARS-CoV-2/human/USA/WA-UW-1921/2020, complete genome
486	>MT326067.1 Severe acute respiratory syndrome coronavirus 2 isolate SARS-CoV-2/human/USA/WA-UW-1956/2020, complete genome
487	>MT326066.1 Severe acute respiratory syndrome coronavirus 2 isolate SARS-CoV-2/human/USA/WA-UW-1955/2020, complete genome
488	>MT326065.1 Severe acute respiratory syndrome coronavirus 2 isolate SARS-CoV-2/human/USA/WA-UW-1880/2020, complete genome
489	>MT326063.1 Severe acute respiratory syndrome coronavirus 2 isolate SARS-CoV-2/human/USA/WA-UW-1881/2020, complete genome
490	>MT326061.1 Severe acute respiratory syndrome coronavirus 2 isolate SARS-CoV-2/human/USA/OR-UW-1885/2020, complete genome
491	>MT326058.1 Severe acute respiratory syndrome coronavirus 2 isolate SARS-CoV-2/human/USA/WA-UW-1930/2020, complete genome
492	>MT326056.1 Severe acute respiratory syndrome coronavirus 2 isolate SARS-CoV-2/human/USA/WA-UW-1878/2020, complete genome
493	>MT326055.1 Severe acute respiratory syndrome coronavirus 2 isolate SARS-CoV-2/human/USA/WA-UW-1879/2020, complete genome
494	>MT326054.1 Severe acute respiratory syndrome coronavirus 2 isolate SARS-CoV-2/human/USA/WA-UW-1904/2020, complete genome
495	>MT326053.1 Severe acute respiratory syndrome coronavirus 2 isolate SARS-CoV-2/human/USA/WA-UW-1920/2020, complete genome
496	>MT326052.1 Severe acute respiratory syndrome coronavirus 2 isolate SARS-CoV-2/human/USA/WA-UW-1913/2020, complete genome
497	>MT326051.1 Severe acute respiratory syndrome coronavirus 2 isolate SARS-CoV-2/human/USA/WA-UW-1919/2020, complete genome
498	>MT326049.1 Severe acute respiratory syndrome coronavirus 2 isolate SARS-CoV-2/human/USA/WA-UW-1872/2020, complete genome
499	>MT326048.1 Severe acute respiratory syndrome coronavirus 2 isolate SARS-CoV-2/human/USA/WA-UW-1870/2020, complete genome
500	>MT326046.1 Severe acute respiratory syndrome coronavirus 2 isolate SARS-CoV-2/human/USA/WA-UW-1854/2020, complete genome
501	>MT326042.1 Severe acute respiratory syndrome coronavirus 2 isolate SARS-CoV-2/human/USA/WA-UW-1843/2020, complete genome
502	>MT326041.1 Severe acute respiratory syndrome coronavirus 2 isolate SARS-CoV-2/human/USA/OR-UW-1849/2020, complete genome
503	>MT326040.1 Severe acute respiratory syndrome coronavirus 2 isolate SARS-CoV-2/human/USA/OR-UW-1851/2020, complete genome
504	>MT326039.1 Severe acute respiratory syndrome coronavirus 2 isolate SARS-CoV-2/human/USA/WA-UW-1863/2020, complete genome
505	>MT326036.1 Severe acute respiratory syndrome coronavirus 2 isolate SARS-CoV-2/human/USA/WA-UW-1864/2020, complete genome
506	>MT326035.1 Severe acute respiratory syndrome coronavirus 2 isolate SARS-CoV-2/human/USA/WA-UW-1868/2020, complete genome
507	>MT326030.1 Severe acute respiratory syndrome coronavirus 2 isolate SARS-CoV-2/human/USA/WA-UW-2009/2020, complete genome
508	>MT326029.1 Severe acute respiratory syndrome coronavirus 2 isolate SARS-CoV-2/human/USA/WA-UW-2016/2020, complete genome
509	>MT326028.1 Severe acute respiratory syndrome coronavirus 2 isolate SARS-CoV-2/human/USA/WA-UW-1986/2020, complete genome
510	>MT326027.1 Severe acute respiratory syndrome coronavirus 2 isolate SARS-CoV-2/human/USA/WA-UW-1977/2020, complete genome
511	>MT326024.1 Severe acute respiratory syndrome coronavirus 2 isolate SARS-CoV-2/human/USA/WA-UW-1994/2020, complete genome
512	>MT326023.1 Severe acute respiratory syndrome coronavirus 2 isolate SARS-CoV-2/human/USA/WA-UW-2006/2020, complete genome
513	>MT324684.1 Severe acute respiratory syndrome coronavirus 2 isolate SARS-CoV-2/ENV/USA/UF-3/2020, complete genome
514	>MT256924.2 Severe acute respiratory syndrome coronavirus 2 isolate SARS-CoV-2/human/COL/79256_Antioquia/2020, complete genome
515	>MT066156.1 Severe acute respiratory syndrome coronavirus 2 isolate SARS-CoV-2/human/ITA/INMI1/2020, complete genome
516	>MT322424.1 Severe acute respiratory syndrome coronavirus 2 isolate SARS-CoV-2/human/USA/VA-DCLS-0046/2020, complete genome
517	>MT322423.1 Severe acute respiratory syndrome coronavirus 2 isolate SARS-CoV-2/human/USA/VA-DCLS-0045/2020, complete genome
518	>MT322422.1 Severe acute respiratory syndrome coronavirus 2 isolate SARS-CoV-2/human/USA/VA-DCLS-0044/2020, complete genome
519	>MT322421.1 Severe acute respiratory syndrome coronavirus 2 isolate SARS-CoV-2/human/USA/VA-DCLS-0043/2020, complete genome
520	>MT322420.1 Severe acute respiratory syndrome coronavirus 2 isolate SARS-CoV-2/human/USA/VA-DCLS-0042/2020, complete genome
521	>MT322419.1 Severe acute respiratory syndrome coronavirus 2 isolate SARS-CoV-2/human/USA/VA-DCLS-0040/2020, complete genome
522	>MT322418.1 Severe acute respiratory syndrome coronavirus 2 isolate SARS-CoV-2/human/USA/VA-DCLS-0039/2020, complete genome
523	>MT322417.1 Severe acute respiratory syndrome coronavirus 2 isolate SARS-CoV-2/human/USA/VA-DCLS-0038/2020, complete genome
524	>MT322416.1 Severe acute respiratory syndrome coronavirus 2 isolate SARS-CoV-2/human/USA/VA-DCLS-0036/2020, complete genome
525	>MT322415.1 Severe acute respiratory syndrome coronavirus 2 isolate SARS-CoV-2/human/USA/VA-DCLS-0034/2020, complete genome
526	>MT322414.1 Severe acute respiratory syndrome coronavirus 2 isolate SARS-CoV-2/human/USA/VA-DCLS-0033/2020, complete genome
527	>MT322413.1 Severe acute respiratory syndrome coronavirus 2 isolate SARS-CoV-2/human/USA/VA-DCLS-0031/2020, complete genome
528	>MT322412.1 Severe acute respiratory syndrome coronavirus 2 isolate SARS-CoV-2/human/USA/VA-DCLS-0024/2020, complete genome
529	>MT322411.1 Severe acute respiratory syndrome coronavirus 2 isolate SARS-CoV-2/human/USA/VA-DCLS-0021/2020, complete genome
530	>MT322410.1 Severe acute respiratory syndrome coronavirus 2 isolate SARS-CoV-2/human/USA/VA-DCLS-0020/2020, complete genome
531	>MT322409.1 Severe acute respiratory syndrome coronavirus 2 isolate SARS-CoV-2/human/USA/VA-DCLS-0019/2020, complete genome
532	>MT322408.1 Severe acute respiratory syndrome coronavirus 2 isolate SARS-CoV-2/human/USA/VA-DCLS-0018/2020, complete genome
533	>MT322407.1 Severe acute respiratory syndrome coronavirus 2 isolate SARS-CoV-2/human/USA/VA-DCLS-0017/2020, complete genome
534	>MT322406.1 Severe acute respiratory syndrome coronavirus 2 isolate SARS-CoV-2/human/USA/VA-DCLS-0016/2020, complete genome
535	>MT322405.1 Severe acute respiratory syndrome coronavirus 2 isolate SARS-CoV-2/human/USA/VA-DCLS-0012/2020, complete genome
536	>MT322404.1 Severe acute respiratory syndrome coronavirus 2 isolate SARS-CoV-2/human/USA/VA-DCLS-0011/2020, complete genome
537	>MT322403.1 Severe acute respiratory syndrome coronavirus 2 isolate SARS-CoV-2/human/USA/VA-DCLS-0010/2020, complete genome
538	>MT322402.1 Severe acute respiratory syndrome coronavirus 2 isolate SARS-CoV-2/human/USA/VA-DCLS-0009/2020, complete genome
539	>MT322401.1 Severe acute respiratory syndrome coronavirus 2 isolate SARS-CoV-2/human/USA/VA-DCLS-0008/2020, complete genome
540	>MT322400.1 Severe acute respiratory syndrome coronavirus 2 isolate SARS-CoV-2/human/USA/VA-DCLS-0007/2020, complete genome
541	>MT322398.1 Severe acute respiratory syndrome coronavirus 2 isolate SARS-CoV-2/human/USA/VA-DCLS-0005/2020, complete genome
542	>MT322397.1 Severe acute respiratory syndrome coronavirus 2 isolate SARS-CoV-2/human/USA/VA-DCLS-0004/2020, complete genome
543	>MT322396.1 Severe acute respiratory syndrome coronavirus 2 isolate SARS-CoV-2/human/USA/VA-DCLS-0003/2020, complete genome
544	>MT322395.1 Severe acute respiratory syndrome coronavirus 2 isolate SARS-CoV-2/human/USA/VA-DCLS-0002/2020, complete genome
545	>MT322394.1 Severe acute respiratory syndrome coronavirus 2 isolate SARS-CoV-2/human/USA/VA-DCLS-0001/2020, complete genome
546	>MT077125.1 Severe acute respiratory syndrome coronavirus 2 isolate SARS-CoV-2/human/ITA/INMI1/2020, complete genome
547	>MT039874.1 Severe acute respiratory syndrome coronavirus 2 isolate SARS-CoV-2/human/CHN/IME-HZ01/2020, complete genome
548	>MT320538.1 Severe acute respiratory syndrome coronavirus 2 isolate SARS-CoV-2/human/FRA/KRA-ROB/2020, complete genome
549	>MT300186.2 Severe acute respiratory syndrome coronavirus 2 isolate SARS-CoV-2/human/USA/UNC_200173/2020, complete genome
550	>MT292575.1 Severe acute respiratory syndrome coronavirus 2 isolate SARS-CoV-2/human/ESP/Valencia16/2020, complete genome
551	>MT292574.1 Severe acute respiratory syndrome coronavirus 2 isolate SARS-CoV-2/human/ESP/Valencia15/2020, complete genome
552	>MT292573.1 Severe acute respiratory syndrome coronavirus 2 isolate SARS-CoV-2/human/ESP/Valencia14/2020, complete genome
553	>MT292572.1 Severe acute respiratory syndrome coronavirus 2 isolate SARS-CoV-2/human/ESP/Valencia11/2020, complete genome
554	>MT292571.1 Severe acute respiratory syndrome coronavirus 2 isolate SARS-CoV-2/human/ESP/Valencia12/2020, complete genome
555	>MT292570.1 Severe acute respiratory syndrome coronavirus 2 isolate SARS-CoV-2/human/ESP/Valencia17/2020, complete genome
556	>MT292569.1 Severe acute respiratory syndrome coronavirus 2 isolate SARS-CoV-2/human/ESP/Valencia13/2020, complete genome
557	>MT259231.1 Severe acute respiratory syndrome coronavirus 2 isolate SARS-CoV-2/human/CHN/Wuhan_YB012504/2020, complete genome
558	>MT259230.1 Severe acute respiratory syndrome coronavirus 2 isolate SARS-CoV-2/human/CHN/Wuhan_YB012506/2020, complete genome
559	>MT259229.1 Severe acute respiratory syndrome coronavirus 2 isolate SARS-CoV-2/human/CHN/Wuhan_YB012602/2020, complete genome
560	>MT259228.1 Severe acute respiratory syndrome coronavirus 2 isolate SARS-CoV-2/human/CHN/Wuhan_YB012605/2020, complete genome
561	>MT259227.1 Severe acute respiratory syndrome coronavirus 2 isolate SARS-CoV-2/human/CHN/Wuhan_YB012611/2020, complete genome
562	>MT259226.1 Severe acute respiratory syndrome coronavirus 2 isolate SARS-CoV-2/human/CHN/Wuhan_OS52/2020, complete genome
563	>MT198652.2 Severe acute respiratory syndrome coronavirus 2 isolate SARS-CoV-2/human/ESP/Valencia003/2020, complete genome
564	>MT240479.1 Severe acute respiratory syndrome coronavirus 2 isolate SARS-CoV-2/human/PAK/Gilgit1/2020, complete genome
565	>MT233523.1 Severe acute respiratory syndrome coronavirus 2 isolate SARS-CoV-2/human/ESP/Valencia8/2020, complete genome
566	>MT233522.1 Severe acute respiratory syndrome coronavirus 2 isolate SARS-CoV-2/human/ESP/Valencia7/2020, complete genome
567	>MT233519.1 Severe acute respiratory syndrome coronavirus 2 isolate SARS-CoV-2/human/ESP/Valencia5/2020, complete genome
568	>MT246667.1 Severe acute respiratory syndrome coronavirus 2 strain FDAARGOS_983 isolate 2019-nCoV/USA-WA1/2020, complete genome
569	>MT233526.1 Severe acute respiratory syndrome coronavirus 2 strain FDAARGOS_983 isolate 2019-nCoV/USA-WA1/2020, complete genome
570	>MT188341.1 Severe acute respiratory syndrome coronavirus 2 isolate USA/MN1-MDH1/2020, complete genome
571	>MT188340.1 Severe acute respiratory syndrome coronavirus 2 isolate USA/MN2-MDH2/2020, complete genome
572	>MT188339.1 Severe acute respiratory syndrome coronavirus 2 isolate USA/MN3-MDH3/2020, complete genome
573	>MT019533.1 Severe acute respiratory syndrome coronavirus 2 isolate BetaCoV/Wuhan/IPBCAMS-WH-05/2020, complete genome
574	>MT019532.1 Severe acute respiratory syndrome coronavirus 2 isolate BetaCoV/Wuhan/IPBCAMS-WH-04/2019, complete genome
575	>MT019531.1 Severe acute respiratory syndrome coronavirus 2 isolate BetaCoV/Wuhan/IPBCAMS-WH-03/2019, complete genome
576	>MT019530.1 Severe acute respiratory syndrome coronavirus 2 isolate BetaCoV/Wuhan/IPBCAMS-WH-02/2019, complete genome
577	>MT019529.1 Severe acute respiratory syndrome coronavirus 2 isolate BetaCoV/Wuhan/IPBCAMS-WH-01/2019, complete genome
578	>MT308704.1 Severe acute respiratory syndrome coronavirus 2 isolate SARS-CoV-2/human/USA/UNC_200189/2020, complete genome
579	>MT308703.1 Severe acute respiratory syndrome coronavirus 2 isolate SARS-CoV-2/human/USA/UNC_200181/2020, complete genome
580	>MT308702.1 Severe acute respiratory syndrome coronavirus 2 isolate SARS-CoV-2/human/USA/UNC_200191/2020, complete genome
581	>MT304491.1 Severe acute respiratory syndrome coronavirus 2 isolate SARS-CoV-2/human/USA/TX_2967/2020, complete genome
582	>MT304490.1 Severe acute respiratory syndrome coronavirus 2 isolate SARS-CoV-2/human/USA/TX_2817/2020, complete genome
583	>MT304489.1 Severe acute respiratory syndrome coronavirus 2 isolate SARS-CoV-2/human/USA/TX_2039/2020, complete genome
584	>MT304488.1 Severe acute respiratory syndrome coronavirus 2 isolate SARS-CoV-2/human/USA/RI_0556/2020, complete genome
585	>MT304487.1 Severe acute respiratory syndrome coronavirus 2 isolate SARS-CoV-2/human/USA/OR_5430/2020, complete genome
586	>MT304486.1 Severe acute respiratory syndrome coronavirus 2 isolate SARS-CoV-2/human/USA/NY_2929/2020, complete genome
587	>MT304485.1 Severe acute respiratory syndrome coronavirus 2 isolate SARS-CoV-2/human/USA/NH_0008/2020, complete genome
588	>MT304484.1 Severe acute respiratory syndrome coronavirus 2 isolate SARS-CoV-2/human/USA/NH_0004/2020, complete genome
589	>MT304483.1 Severe acute respiratory syndrome coronavirus 2 isolate SARS-CoV-2/human/USA/IL_1375/2020, complete genome
590	>MT304482.1 Severe acute respiratory syndrome coronavirus 2 isolate SARS-CoV-2/human/USA/IL_1293/2020, complete genome
591	>MT304481.1 Severe acute respiratory syndrome coronavirus 2 isolate SARS-CoV-2/human/USA/GA_1445/2020, complete genome
592	>MT304480.1 Severe acute respiratory syndrome coronavirus 2 isolate SARS-CoV-2/human/USA/GA_1320/2020, complete genome
593	>MT304479.1 Severe acute respiratory syndrome coronavirus 2 isolate SARS-CoV-2/human/USA/GA_1299/2020, complete genome
594	>MT304478.1 Severe acute respiratory syndrome coronavirus 2 isolate SARS-CoV-2/human/USA/FL_6318/2020, complete genome
595	>MT304477.1 Severe acute respiratory syndrome coronavirus 2 isolate SARS-CoV-2/human/USA/AZ_4811/2020, complete genome
596	>MT304476.1 Severe acute respiratory syndrome coronavirus 2 isolate SARS-CoV-2/human/KOR/BA-ACH_2719/2020, complete genome
597	>MT304475.1 Severe acute respiratory syndrome coronavirus 2 isolate SARS-CoV-2/human/KOR/BA-ACH_2718/2020, complete genome
598	>MT304474.1 Severe acute respiratory syndrome coronavirus 2 isolate SARS-CoV-2/human/KOR/BA-ACH_2604/2020, complete genome
599	>MT295465.1 Severe acute respiratory syndrome coronavirus 2 isolate SARS-CoV-2/human/USA/UF-2/2020, complete genome
600	>MT295464.1 Severe acute respiratory syndrome coronavirus 2 isolate SARS CoV-2/human/USA/UF-1/2020, complete genome
601	>MT291836.1 Severe acute respiratory syndrome coronavirus 2 isolate SARS-CoV-2/human/CHN/Wuhan_IME-BJ07/2020, complete genome
602	>MT291835.1 Severe acute respiratory syndrome coronavirus 2 isolate SARS-CoV-2/human/CHN/Wuhan_IME-BJ05/2020, complete genome
603	>MT291834.1 Severe acute respiratory syndrome coronavirus 2 isolate SARS-CoV-2/human/CHN/Wuhan_IME-BJ04/2020, complete genome
604	>MT291833.1 Severe acute respiratory syndrome coronavirus 2 isolate SARS-CoV-2/human/CHN/Wuhan_IME-BJ03/2020, complete genome
605	>MT291832.1 Severe acute respiratory syndrome coronavirus 2 isolate SARS-CoV-2/human/CHN/Wuhan_IME-BJ02/2020, complete genome
606	>MT291831.1 Severe acute respiratory syndrome coronavirus 2 isolate SARS-CoV-2/human/CHN/Wuhan_IME-BJ01/2020, complete genome
607	>MT291830.1 Severe acute respiratory syndrome coronavirus 2 isolate SARS-CoV-2/human/CHN/Wuhan_IME-WH05/2019, complete genome
608	>MT291829.1 Severe acute respiratory syndrome coronavirus 2 isolate SARS-CoV-2/human/CHN/Wuhan_IME-WH04/2019, complete genome
609	>MT291828.1 Severe acute respiratory syndrome coronavirus 2 isolate SARS-CoV-2/human/CHN/Wuhan_IME-WH03/2019, complete genome
610	>MT291827.1 Severe acute respiratory syndrome coronavirus 2 isolate SARS-CoV-2/human/CHN/Wuhan_IME-WH02/2019, complete genome
611	>MT291826.1 Severe acute respiratory syndrome coronavirus 2 isolate SARS-CoV-2/human/CHN/Wuhan_IME-WH01/2019, complete genome
612	>MT276598.1 Severe acute respiratory syndrome coronavirus 2 isolate SARS-CoV-2/human/ISR/ISR_IT0320/2020, complete genome
613	>MT276597.1 Severe acute respiratory syndrome coronavirus 2 isolate SARS-CoV-2/human/ISR/ISR_JP0320/2020, complete genome
614	>MT276331.1 Severe acute respiratory syndrome coronavirus 2 isolate SARS-CoV-2/human/USA/TX_2020/2020, complete genome
615	>MT276330.1 Severe acute respiratory syndrome coronavirus 2 isolate SARS-CoV-2/human/USA/FL_5091/2020, complete genome
616	>MT276329.1 Severe acute respiratory syndrome coronavirus 2 isolate SARS-CoV-2/human/USA/FL_5125/2020, complete genome
617	>MT276328.1 Severe acute respiratory syndrome coronavirus 2 isolate SARS-CoV-2/human/USA/OR_2656/2020, complete genome
618	>MT276327.1 Severe acute respiratory syndrome coronavirus 2 isolate SARS-CoV-2/human/USA/GA_2742/2020, complete genome
619	>MT276326.1 Severe acute respiratory syndrome coronavirus 2 isolate SARS-CoV-2/human/USA/GA_2741/2020, complete genome
620	>MT276325.1 Severe acute respiratory syndrome coronavirus 2 isolate SARS-CoV-2/human/USA/WA_5030/2020, complete genome
621	>MT276324.1 Severe acute respiratory syndrome coronavirus 2 isolate SARS-CoV-2/human/USA/CA_2602/2020, complete genome
622	>MT276323.1 Severe acute respiratory syndrome coronavirus 2 isolate SARS-CoV-2/human/USA/RI_0520/2020, complete genome
623	>MT262916.1 Severe acute respiratory syndrome coronavirus 2 isolate SARS-CoV-2/human/USA/WA-NH23/2020, complete genome
624	>MT262915.1 Severe acute respiratory syndrome coronavirus 2 isolate SARS-CoV-2/human/USA/WA-NH13/2020, complete genome
625	>MT262914.1 Severe acute respiratory syndrome coronavirus 2 isolate SARS-CoV-2/human/USA/WA-NH24/2020, complete genome
626	>MT262913.1 Severe acute respiratory syndrome coronavirus 2 isolate SARS-CoV-2/human/USA/WA-NH22/2020, complete genome
627	>MT262912.1 Severe acute respiratory syndrome coronavirus 2 isolate SARS-CoV-2/human/USA/WA-NH21/2020, complete genome
628	>MT262911.1 Severe acute respiratory syndrome coronavirus 2 isolate SARS-CoV-2/human/USA/WA-NH20/2020, complete genome
629	>MT262910.1 Severe acute respiratory syndrome coronavirus 2 isolate SARS-CoV-2/human/USA/WA-NH19/2020, complete genome
630	>MT262909.1 Severe acute respiratory syndrome coronavirus 2 isolate SARS-CoV-2/human/USA/WA-NH18/2020, complete genome
631	>MT262908.1 Severe acute respiratory syndrome coronavirus 2 isolate SARS-CoV-2/human/USA/WA-NH17/2020, complete genome
632	>MT262907.1 Severe acute respiratory syndrome coronavirus 2 isolate SARS-CoV-2/human/USA/WA-NH14/2020, complete genome
633	>MT262906.1 Severe acute respiratory syndrome coronavirus 2 isolate SARS-CoV-2/human/USA/WA-NH12/2020, complete genome
634	>MT262905.1 Severe acute respiratory syndrome coronavirus 2 isolate SARS-CoV-2/human/USA/WA-NH11/2020, complete genome
635	>MT262904.1 Severe acute respiratory syndrome coronavirus 2 isolate SARS-CoV-2/human/USA/WA-NH10/2020, complete genome
636	>MT262903.1 Severe acute respiratory syndrome coronavirus 2 isolate SARS-CoV-2/human/USA/WA-NH9/2020, complete genome
637	>MT262902.1 Severe acute respiratory syndrome coronavirus 2 isolate SARS-CoV-2/human/USA/WA-NH8/2020, complete genome
638	>MT262901.1 Severe acute respiratory syndrome coronavirus 2 isolate SARS-CoV-2/human/USA/WA-NH7/2020, complete genome
639	>MT262900.1 Severe acute respiratory syndrome coronavirus 2 isolate SARS-CoV-2/human/USA/WA-NH6/2020, complete genome
640	>MT262899.1 Severe acute respiratory syndrome coronavirus 2 isolate SARS-CoV-2/human/USA/WA-NH5/2020, complete genome
641	>MT262898.1 Severe acute respiratory syndrome coronavirus 2 isolate SARS-CoV-2/human/USA/WA-NH4/2020, complete genome
642	>MT262897.1 Severe acute respiratory syndrome coronavirus 2 isolate SARS-CoV-2/human/USA/WA-NH3/2020, complete genome
643	>MT262896.1 Severe acute respiratory syndrome coronavirus 2 isolate SARS-CoV-2/human/USA/WA-NH2/2020, complete genome
644	>MT262993.1 Severe acute respiratory syndrome coronavirus 2 isolate SARS-Cov-2/human/PAK/Manga1/2020, complete genome
645	>MT258383.1 Severe acute respiratory syndrome coronavirus 2 isolate SARS-CoV-2/human/USA/CZB-RR057-015/2020, complete genome
646	>MT258382.1 Severe acute respiratory syndrome coronavirus 2 isolate SARS-CoV-2/human/USA/CZB-RR057-014/2020, complete genome
647	>MT258381.1 Severe acute respiratory syndrome coronavirus 2 isolate SARS-CoV-2/human/USA/CZB-RR057-013/2020, complete genome
648	>MT258380.1 Severe acute respiratory syndrome coronavirus 2 isolate SARS-CoV-2/human/USA/CZB-RR057-011/2020, complete genome
649	>MT258379.1 Severe acute respiratory syndrome coronavirus 2 isolate SARS-CoV-2/human/USA/CZB-RR057-007/2020, complete genome
650	>MT258378.1 Severe acute respiratory syndrome coronavirus 2 isolate SARS-CoV-2/human/USA/CZB-RR057-006/2020, complete genome
651	>MT258377.1 Severe acute respiratory syndrome coronavirus 2 isolate SARS-CoV-2/human/USA/CZB-RR057-005/2020, complete genome
652	>MT253710.1 Severe acute respiratory syndrome coronavirus 2 isolate SARS-CoV-2/human/CHN/HZ-91/2020, complete genome
653	>MT253709.1 Severe acute respiratory syndrome coronavirus 2 isolate SARS-CoV-2/human/CHN/HZ-90/2020, complete genome
654	>MT253708.1 Severe acute respiratory syndrome coronavirus 2 isolate SARS-CoV-2/human/CHN/HZ-79/2020, complete genome
655	>MT253707.1 Severe acute respiratory syndrome coronavirus 2 isolate SARS-CoV-2/human/CHN/HZ-638/2020, complete genome
656	>MT253706.1 Severe acute respiratory syndrome coronavirus 2 isolate SARS-CoV-2/human/CHN/HZ-62/2020, complete genome
657	>MT253705.1 Severe acute respiratory syndrome coronavirus 2 isolate SARS-CoV-2/human/CHN/HZ-60/2020, complete genome
658	>MT253704.1 Severe acute respiratory syndrome coronavirus 2 isolate SARS-CoV-2/human/CHN/HZ-576/2020, complete genome
659	>MT253703.1 Severe acute respiratory syndrome coronavirus 2 isolate SARS-CoV-2/human/CHN/HZ-551/2020, complete genome
660	>MT253702.1 Severe acute respiratory syndrome coronavirus 2 isolate SARS-CoV-2/human/CHN/HZ-49/2020, complete genome
661	>MT253701.1 Severe acute respiratory syndrome coronavirus 2 isolate SARS-CoV-2/human/CHN/HZ-48/2020, complete genome
662	>MT253700.1 Severe acute respiratory syndrome coronavirus 2 isolate SARS-CoV-2/human/CHN/HZ-481/2020, complete genome
663	>MT253699.1 Severe acute respiratory syndrome coronavirus 2 isolate SARS-CoV-2/human/CHN/HZ-477/2020, complete genome
664	>MT253698.1 Severe acute respiratory syndrome coronavirus 2 isolate SARS-CoV-2/human/CHN/HZ-185/2020, complete genome
665	>MT253697.1 Severe acute respiratory syndrome coronavirus 2 isolate SARS-CoV-2/human/CHN/HZ-178/2020, complete genome
666	>MT253696.1 Severe acute respiratory syndrome coronavirus 2 isolate SARS-CoV-2/human/CHN/HZ-162/2020, complete genome
667	>MT246490.1 Severe acute respiratory syndrome coronavirus 2 isolate SARS-CoV-2/human/USA/WA-UW233/2020, complete genome
668	>MT246489.1 Severe acute respiratory syndrome coronavirus 2 isolate SARS-CoV-2/human/USA/WA-UW232/2020, complete genome
669	>MT246488.1 Severe acute respiratory syndrome coronavirus 2 isolate SARS-CoV-2/human/USA/WA-UW231/2020, complete genome
670	>MT246487.1 Severe acute respiratory syndrome coronavirus 2 isolate SARS-CoV-2/human/USA/WA-UW230/2020, complete genome
671	>MT246486.1 Severe acute respiratory syndrome coronavirus 2 isolate SARS-CoV-2/human/USA/WA-UW229/2020, complete genome
672	>MT246485.1 Severe acute respiratory syndrome coronavirus 2 isolate SARS-CoV-2/human/USA/WA-UW228/2020, complete genome
673	>MT246484.1 Severe acute respiratory syndrome coronavirus 2 isolate SARS-CoV-2/human/USA/WA-UW227/2020, complete genome
674	>MT246482.1 Severe acute respiratory syndrome coronavirus 2 isolate SARS-CoV-2/human/USA/WA-UW225/2020, complete genome
675	>MT246481.1 Severe acute respiratory syndrome coronavirus 2 isolate SARS-CoV-2/human/USA/WA-UW224/2020, complete genome
676	>MT246480.1 Severe acute respiratory syndrome coronavirus 2 isolate SARS-CoV-2/human/USA/WA-UW223/2020, complete genome
677	>MT246479.1 Severe acute respiratory syndrome coronavirus 2 isolate SARS-CoV-2/human/USA/WA-UW222/2020, complete genome
678	>MT246478.1 Severe acute respiratory syndrome coronavirus 2 isolate SARS-CoV-2/human/USA/WA-UW221/2020, complete genome
679	>MT246477.1 Severe acute respiratory syndrome coronavirus 2 isolate SARS-CoV-2/human/USA/WA-UW220/2020, complete genome
680	>MT246476.1 Severe acute respiratory syndrome coronavirus 2 isolate SARS-CoV-2/human/USA/WA-UW219/2020, complete genome
681	>MT246475.1 Severe acute respiratory syndrome coronavirus 2 isolate SARS-CoV-2/human/USA/WA-UW218/2020, complete genome
682	>MT246474.1 Severe acute respiratory syndrome coronavirus 2 isolate SARS-CoV-2/human/USA/WA-UW217/2020, complete genome
683	>MT246473.1 Severe acute respiratory syndrome coronavirus 2 isolate SARS-CoV-2/human/USA/WA-UW216/2020, complete genome
684	>MT246472.1 Severe acute respiratory syndrome coronavirus 2 isolate SARS-CoV-2/human/USA/WA-UW215/2020, complete genome
685	>MT246471.1 Severe acute respiratory syndrome coronavirus 2 isolate SARS-CoV-2/human/USA/WA-UW214/2020, complete genome
686	>MT246470.1 Severe acute respiratory syndrome coronavirus 2 isolate SARS-CoV-2/human/USA/WA-UW213/2020, complete genome
687	>MT246469.1 Severe acute respiratory syndrome coronavirus 2 isolate SARS-CoV-2/human/USA/WA-UW212/2020, complete genome
688	>MT246468.1 Severe acute respiratory syndrome coronavirus 2 isolate SARS-CoV-2/human/USA/WA-UW211/2020, complete genome
689	>MT246467.1 Severe acute respiratory syndrome coronavirus 2 isolate SARS-CoV-2/human/USA/WA-UW210/2020, complete genome
690	>MT246466.1 Severe acute respiratory syndrome coronavirus 2 isolate SARS-CoV-2/human/USA/WA-UW209/2020, complete genome
691	>MT246464.1 Severe acute respiratory syndrome coronavirus 2 isolate SARS-CoV-2/human/USA/WA-UW207/2020, complete genome
692	>MT246462.1 Severe acute respiratory syndrome coronavirus 2 isolate SARS-CoV-2/human/USA/WA-UW205/2020, complete genome
693	>MT246461.1 Severe acute respiratory syndrome coronavirus 2 isolate SARS-CoV-2/human/USA/WA-UW204/2020, complete genome
694	>MT246460.1 Severe acute respiratory syndrome coronavirus 2 isolate SARS-CoV-2/human/USA/WA-UW203/2020, complete genome
695	>MT246459.1 Severe acute respiratory syndrome coronavirus 2 isolate SARS-CoV-2/human/USA/WA-UW202/2020, complete genome
696	>MT246458.1 Severe acute respiratory syndrome coronavirus 2 isolate SARS-CoV-2/human/USA/WA-UW201/2020, complete genome
697	>MT246457.1 Severe acute respiratory syndrome coronavirus 2 isolate SARS-CoV-2/human/USA/WA-UW200/2020, complete genome
698	>MT246456.1 Severe acute respiratory syndrome coronavirus 2 isolate SARS-CoV-2/human/USA/WA-UW199/2020, complete genome
699	>MT246455.1 Severe acute respiratory syndrome coronavirus 2 isolate SARS-CoV-2/human/USA/WA-UW198/2020, complete genome
700	>MT246454.1 Severe acute respiratory syndrome coronavirus 2 isolate SARS-CoV-2/human/USA/WA-UW197/2020, complete genome
701	>MT246453.1 Severe acute respiratory syndrome coronavirus 2 isolate SARS-CoV-2/human/USA/WA-UW196/2020, complete genome
702	>MT246452.1 Severe acute respiratory syndrome coronavirus 2 isolate SARS-CoV-2/human/USA/WA-UW195/2020, complete genome
703	>MT246451.1 Severe acute respiratory syndrome coronavirus 2 isolate SARS-CoV-2/human/USA/WA-UW194/2020, complete genome
704	>MT246450.1 Severe acute respiratory syndrome coronavirus 2 isolate SARS-CoV-2/human/USA/WA-UW193/2020, complete genome
705	>MT246449.1 Severe acute respiratory syndrome coronavirus 2 isolate SARS-CoV-2/human/USA/WA-UW192/2020, complete genome
706	>MT226610.1 Severe acute respiratory syndrome coronavirus 2 isolate SARS-CoV-2/human/CHN/KMS1/2020, complete genome
707	>MT192773.1 Severe acute respiratory syndrome coronavirus 2 isolate SARS-CoV-2/human/VNM/nCoV-19-02S/2020, complete genome
708	>MT192772.1 Severe acute respiratory syndrome coronavirus 2 isolate SARS-CoV-2/human/VNM/nCoV-19-01S/2020, complete genome
709	>MT192765.1 Severe acute respiratory syndrome coronavirus 2 isolate SARS-CoV-2/human/USA/PC00101P/2020, complete genome
710	>MT192759.1 Severe acute respiratory syndrome coronavirus 2 isolate SARS-CoV-2/human/TWN/CGMH-CGU-01/2020, complete genome
711	>MT123293.2 Severe acute respiratory syndrome coronavirus 2 isolate SARS-CoV-2/human/CHN/IQTC03/2020, complete genome
712	>MT123292.2 Severe acute respiratory syndrome coronavirus 2 isolate SARS-CoV-2/human/CHN/IQTC04/2020, complete genome
713	>MT123291.2 Severe acute respiratory syndrome coronavirus 2 isolate SARS-CoV-2/human/CHN/IQTC02/2020, complete genome
714	>MT093631.2 Severe acute respiratory syndrome coronavirus 2 isolate SARS-CoV-2/human/CHN/WH-09/2020, complete genome
715	>MT163719.1 Severe acute respiratory syndrome coronavirus 2 isolate SARS-CoV-2/human/USA/WA7-UW4/2020, complete genome
716	>MT163718.1 Severe acute respiratory syndrome coronavirus 2 isolate SARS-CoV-2/human/USA/WA6-UW3/2020, complete genome
717	>MT163717.1 Severe acute respiratory syndrome coronavirus 2 isolate SARS-CoV-2/human/USA/WA4-UW2/2020, complete genome
718	>MT163716.1 Severe acute respiratory syndrome coronavirus 2 isolate SARS-CoV-2/human/USA/WA3-UW1/2020, complete genome
719	>MT121215.1 Severe acute respiratory syndrome coronavirus 2 isolate SARS-CoV-2/human/CHN/SH01/2020, complete genome
720	>MT152824.1 Severe acute respiratory syndrome coronavirus 2 isolate SARS-CoV-2/human/USA/WA2/2020, complete genome
721	>MT135044.1 Severe acute respiratory syndrome coronavirus 2 isolate SARS-CoV-2/human/CHN/235/2020, complete genome
722	>MT135043.1 Severe acute respiratory syndrome coronavirus 2 isolate SARS-CoV-2/human/CHN/233/2020, complete genome
723	>MT135042.1 Severe acute respiratory syndrome coronavirus 2 isolate SARS-CoV-2/human/CHN/231/2020, complete genome
724	>MT135041.1 Severe acute respiratory syndrome coronavirus 2 isolate SARS-CoV-2/human/CHN/105/2020, complete genome
725	>MT123290.1 Severe acute respiratory syndrome coronavirus 2 isolate SARS-CoV-2/human/CHN/IQTC01/2020, complete genome
726	>MT093571.1 Severe acute respiratory syndrome coronavirus 2 isolate SARS-CoV-2/human/SWE/01/2020, complete genome
727	>MT072688.1 Severe acute respiratory syndrome coronavirus 2 isolate SARS-CoV-2/human/NPL/61-TW/2020, complete genome
728	>MT066176.1 Severe acute respiratory syndrome coronavirus 2 isolate SARS-CoV-2/NTU02/TWN/human/2020, complete genome
729	>MT066175.1 Severe acute respiratory syndrome coronavirus 2 isolate SARS-CoV-2/NTU01/TWN/human/2020, complete genome
730	>MT050493.1 Severe acute respiratory syndrome coronavirus 2 isolate SARS-CoV-2/human/IND/166/2020, complete genome
731	>MT049951.1 Severe acute respiratory syndrome coronavirus 2 isolate SARS-CoV-2/human/CHN/Yunnan-01/2020, complete genome
732	>MT012098.1 Severe acute respiratory syndrome coronavirus 2 isolate SARS-CoV-2/human/IND/29/2020, complete genome
733	>LC534419.1 Severe acute respiratory syndrome coronavirus 2 SARS-CoV-2/Hu/Kng/19-437 RNA, complete genome
734	>LC534418.1 Severe acute respiratory syndrome coronavirus 2 SARS-CoV-2/Hu/DP/Kng/19-031 RNA, complete genome
735	>MN985325.1 Severe acute respiratory syndrome coronavirus 2 isolate 2019-nCoV/USA-WA1/2020, complete genome
736	>MN996531.1 Severe acute respiratory syndrome coronavirus 2 isolate WIV07, complete genome
737	>MN996530.1 Severe acute respiratory syndrome coronavirus 2 isolate WIV06, complete genome
738	>MN996529.1 Severe acute respiratory syndrome coronavirus 2 isolate WIV05, complete genome
739	>MN996528.1 Severe acute respiratory syndrome coronavirus 2 isolate WIV04, complete genome
740	>MN996527.1 Severe acute respiratory syndrome coronavirus 2 isolate WIV02, complete genome
741	>MN908947.3 Severe acute respiratory syndrome coronavirus 2 isolate Wuhan-Hu-1, complete genome
742	>MT184913.1 Severe acute respiratory syndrome coronavirus 2 isolate 2019-nCoV/USA-CruiseA-26/2020, complete genome
743	>MT184912.1 Severe acute respiratory syndrome coronavirus 2 isolate 2019-nCoV/USA-CruiseA-25/2020, complete genome
744	>MT184911.1 Severe acute respiratory syndrome coronavirus 2 isolate 2019-nCoV/USA-CruiseA-24/2020, complete genome
745	>MT184910.1 Severe acute respiratory syndrome coronavirus 2 isolate 2019-nCoV/USA-CruiseA-23/2020, complete genome
746	>MT184909.1 Severe acute respiratory syndrome coronavirus 2 isolate 2019-nCoV/USA-CruiseA-22/2020, complete genome
747	>MT184908.1 Severe acute respiratory syndrome coronavirus 2 isolate 2019-nCoV/USA-CruiseA-21/2020, complete genome
748	>MT184907.1 Severe acute respiratory syndrome coronavirus 2 isolate 2019-nCoV/USA-CruiseA-19/2020, complete genome
749	>LC529905.1 Severe acute respiratory syndrome coronavirus 2 TKYE6182_2020 RNA, complete genome
750	>MT159722.1 Severe acute respiratory syndrome coronavirus 2 isolate 2019-nCoV/USA-CruiseA-6/2020, complete genome
751	>MT159721.1 Severe acute respiratory syndrome coronavirus 2 isolate 2019-nCoV/USA-CruiseA-5/2020, complete genome
752	>MT159720.1 Severe acute respiratory syndrome coronavirus 2 isolate 2019-nCoV/USA-CruiseA-4/2020, complete genome
753	>MT159719.1 Severe acute respiratory syndrome coronavirus 2 isolate 2019-nCoV/USA-CruiseA-3/2020, complete genome
754	>MT159718.1 Severe acute respiratory syndrome coronavirus 2 isolate 2019-nCoV/USA-CruiseA-2/2020, complete genome
755	>MT159717.1 Severe acute respiratory syndrome coronavirus 2 isolate 2019-nCoV/USA-CruiseA-1/2020, complete genome
756	>MT159716.1 Severe acute respiratory syndrome coronavirus 2 isolate 2019-nCoV/USA-CruiseA-18/2020, complete genome
757	>MT159715.1 Severe acute respiratory syndrome coronavirus 2 isolate 2019-nCoV/USA-CruiseA-17/2020, complete genome
758	>MT159714.1 Severe acute respiratory syndrome coronavirus 2 isolate 2019-nCoV/USA-CruiseA-16/2020, complete genome
759	>MT159713.1 Severe acute respiratory syndrome coronavirus 2 isolate 2019-nCoV/USA-CruiseA-15/2020, complete genome
760	>MT159712.1 Severe acute respiratory syndrome coronavirus 2 isolate 2019-nCoV/USA-CruiseA-14/2020, complete genome
761	>MT159711.1 Severe acute respiratory syndrome coronavirus 2 isolate 2019-nCoV/USA-CruiseA-13/2020, complete genome
762	>MT159710.1 Severe acute respiratory syndrome coronavirus 2 isolate 2019-nCoV/USA-CruiseA-9/2020, complete genome
763	>MT159709.1 Severe acute respiratory syndrome coronavirus 2 isolate 2019-nCoV/USA-CruiseA-12/2020, complete genome
764	>MT159708.1 Severe acute respiratory syndrome coronavirus 2 isolate 2019-nCoV/USA-CruiseA-11/2020, complete genome
765	>MT159707.1 Severe acute respiratory syndrome coronavirus 2 isolate 2019-nCoV/USA-CruiseA-10/2020, complete genome
766	>MT159706.1 Severe acute respiratory syndrome coronavirus 2 isolate 2019-nCoV/USA-CruiseA-8/2020, complete genome
767	>MT159705.1 Severe acute respiratory syndrome coronavirus 2 isolate 2019-nCoV/USA-CruiseA-7/2020, complete genome
768	>LC528233.1 Severe acute respiratory syndrome coronavirus 2 SARS-CoV-2/Hu/DP/Kng/19-027 RNA, complete genome
769	>LC528232.1 Severe acute respiratory syndrome coronavirus 2 SARS-CoV-2/Hu/DP/Kng/19-020 RNA, complete genome
770	>MT118835.1 Severe acute respiratory syndrome coronavirus 2 isolate 2019-nCoV/USA-CA9/2020, complete genome
771	>MT106054.1 Severe acute respiratory syndrome coronavirus 2 isolate 2019-nCoV/USA-TX1/2020, complete genome
772	>MT106053.1 Severe acute respiratory syndrome coronavirus 2 isolate 2019-nCoV/USA-CA8/2020, complete genome
773	>MT106052.1 Severe acute respiratory syndrome coronavirus 2 isolate 2019-nCoV/USA-CA7/2020, complete genome
774	>MT044258.1 Severe acute respiratory syndrome coronavirus 2 isolate 2019-nCoV/USA-CA6/2020, complete genome
775	>MT044257.1 Severe acute respiratory syndrome coronavirus 2 isolate 2019-nCoV/USA-IL2/2020, complete genome
776	>MT039888.1 Severe acute respiratory syndrome coronavirus 2 isolate 2019-nCoV/USA-MA1/2020, complete genome
777	>MT039887.1 Severe acute respiratory syndrome coronavirus 2 isolate 2019-nCoV/USA-WI1/2020, complete genome
778	>MT039890.1 Severe acute respiratory syndrome coronavirus 2 isolate SNU01, complete genome
779	>MT039873.1 Severe acute respiratory syndrome coronavirus 2 isolate HZ-1, complete genome
780	>MT027064.1 Severe acute respiratory syndrome coronavirus 2 isolate 2019-nCoV/USA-CA5/2020, complete genome
781	>MT027063.1 Severe acute respiratory syndrome coronavirus 2 isolate 2019-nCoV/USA-CA4/2020, complete genome
782	>MT027062.1 Severe acute respiratory syndrome coronavirus 2 isolate 2019-nCoV/USA-CA3/2020, complete genome
783	>MT020881.1 Severe acute respiratory syndrome coronavirus 2 isolate 2019-nCoV/USA-WA1-F6/2020, complete genome
784	>MT020880.1 Severe acute respiratory syndrome coronavirus 2 isolate 2019-nCoV/USA-WA1-A12/2020, complete genome
785	>MN997409.1 Severe acute respiratory syndrome coronavirus 2 isolate 2019-nCoV/USA-AZ1/2020, complete genome
786	>MN994468.1 Severe acute respiratory syndrome coronavirus 2 isolate 2019-nCoV/USA-CA2/2020, complete genome
787	>MN994467.1 Severe acute respiratory syndrome coronavirus 2 isolate 2019-nCoV/USA-CA1/2020, complete genome
788	>MN988713.1 Severe acute respiratory syndrome coronavirus 2 isolate 2019-nCoV/USA-IL1/2020, complete genome
789	>MN975262.1 Severe acute respiratory syndrome coronavirus 2 isolate 2019-nCoV_HKU-SZ-005b_2020, complete genome
790	>MN938384.1 Severe acute respiratory syndrome coronavirus 2 isolate 2019-nCoV_HKU-SZ-002a_2020, complete genome
791	>MT292582.1 Severe acute respiratory syndrome coronavirus 2 isolate SARS-CoV-2/human/ESP/Valencia26/2020 ORF1ab polyprotein (ORF1ab) gene, complete cds; ORF1a polyprotein (ORF1ab) gene, partial cds; surface glycoprotein (S), ORF3a protein (ORF3a), envelope protein (E), membrane glycoprotein (M), and ORF6 protein (ORF6) genes, complete cds; ORF7a protein (ORF7a) and ORF7b (ORF7b) genes, partial cd…
792	>MT292580.1 Severe acute respiratory syndrome coronavirus 2 isolate SARS-CoV-2/human/ESP/Valencia25/2020 ORF1ab polyprotein (ORF1ab) gene, complete cds; ORF1a polyprotein (ORF1ab) gene, partial cds; surface glycoprotein (S), ORF3a protein (ORF3a), envelope protein (E), membrane glycoprotein (M), and ORF6 protein (ORF6) genes, complete cds; ORF7a protein (ORF7a) and ORF7b (ORF7b) genes, partial cd…
793	>MT292581.1 Severe acute respiratory syndrome coronavirus 2 isolate SARS-CoV-2/human/ESP/Valencia23/2020 ORF1ab polyprotein (ORF1ab) gene, complete cds; ORF1a polyprotein (ORF1ab) gene, partial cds; and surface glycoprotein (S), ORF3a protein (ORF3a), envelope protein (E), membrane glycoprotein (M), ORF6 protein (ORF6), ORF7a protein (ORF7a), ORF7b (ORF7b), ORF8 protein (ORF8), nucleocapsid phosp…
794	>MT292579.1 Severe acute respiratory syndrome coronavirus 2 isolate SARS-CoV-2/human/ESP/Valencia22/2020 ORF1ab polyprotein (ORF1ab), ORF1a polyprotein (ORF1ab), surface glycoprotein (S), ORF3a protein (ORF3a), envelope protein (E), membrane glycoprotein (M), ORF6 protein (ORF6), ORF7a protein (ORF7a), ORF7b (ORF7b), ORF8 protein (ORF8), nucleocapsid phosphoprotein (N), and ORF10 protein (ORF10) …
795	>MT292578.1 Severe acute respiratory syndrome coronavirus 2 isolate SARS-CoV-2/human/ESP/Valencia20/2020 ORF1ab polyprotein (ORF1ab), ORF1a polyprotein (ORF1ab), surface glycoprotein (S), ORF3a protein (ORF3a), envelope protein (E), membrane glycoprotein (M), ORF6 protein (ORF6), ORF7a protein (ORF7a), ORF7b (ORF7b), ORF8 protein (ORF8), nucleocapsid phosphoprotein (N), and ORF10 protein (ORF10) …
796	>MT292577.1 Severe acute respiratory syndrome coronavirus 2 isolate SARS-CoV-2/human/ESP/Valencia19/2020 ORF1ab polyprotein (ORF1ab), ORF1a polyprotein (ORF1ab), surface glycoprotein (S), ORF3a protein (ORF3a), envelope protein (E), membrane glycoprotein (M), ORF6 protein (ORF6), ORF7a protein (ORF7a), ORF7b (ORF7b), ORF8 protein (ORF8), nucleocapsid phosphoprotein (N), and ORF10 protein (ORF10) …
797	>MT292576.1 Severe acute respiratory syndrome coronavirus 2 isolate SARS-CoV-2/human/ESP/Valencia18/2020 ORF1ab polyprotein (ORF1ab), ORF1a polyprotein (ORF1ab), surface glycoprotein (S), ORF3a protein (ORF3a), envelope protein (E), membrane glycoprotein (M), ORF6 protein (ORF6), ORF7a protein (ORF7a), ORF7b (ORF7b), ORF8 protein (ORF8), nucleocapsid phosphoprotein (N), and ORF10 protein (ORF10) …
